# Supplementary material for: Functional Compounds of Cold-Pressed Pomegranate Seed Oil: Fatty Acids and Phytosterols Profile as Quality Biomarkers for Origin Discrimination
Source: MDPI journal article supplement (doi:10.3390/foods12132599), 2023-07-05
Supplement: s1 [file s1]

## Supplementary material

### Functional compounds of cold-pressed pomegranate seed oil: fatty acids and phytosterols profile as quality biomarkers for origin discrimination.

Giuseppe Iriti <sup>1</sup>, Sonia Bonacci <sup>1\*</sup>, Vincenzo Lopreiato <sup>2</sup>, Marialaura Frisina <sup>1</sup>, Manuela Oliverio <sup>1</sup> and Antonio Procopio <sup>1</sup>.

<sup>1</sup> Dipartimento di Scienze della Salute, Università “Magna Græcia” di Catanzaro, Viale Europa – Campus Universitario “S. Venuta” – Loc. Germaneto - 88100 (CZ), Italy.

<sup>2</sup> Dipartimento di Scienze Veterinarie, Università di Messina, piazza Pugliatti, 1 – 98122, Messina, Italy.

|                                                                                                                                                                                                                                      |         |
|--------------------------------------------------------------------------------------------------------------------------------------------------------------------------------------------------------------------------------------|---------|
| <b>Figure. S1.</b> GC chromatogram of FAMES in PSO sample <b>with a miniature of punicic and behenic acids.</b>                                                                                                                      | pag. 3  |
| <b>Table S1.</b> Composition of fatty acids expressed as range, means and SD                                                                                                                                                         | pag.    |
| <b>Table S2.</b> Retention time (min.), coefficient of determination ( $R^2$ ) and linear regression model of external standards used for tocopherols calibration, obtained by UV detector (220nm) (a) and fluorescence detector (b) | pag.    |
| <b>Figure S2.</b> Chromatogram (a) and linear regression curve of $\delta$ -tocopherol (b), $\gamma$ -tocopherol (c) and $\alpha$ -tocopherol (d) obtained by UV detector                                                            | pag. 5  |
| <b>Figure S3.</b> Chromatogram (a) and linear regression curve of $\delta$ -tocopherol (b), $\gamma$ -tocopherol (c) and $\alpha$ -tocopherol (d) obtained by fluorescence detector                                                  | pag. 6  |
| <b>Figure S4.</b> HPLC-UV chromatogram of PSO sample                                                                                                                                                                                 | pag. 7  |
| <b>Figure S5.</b> HPLC-UV chromatogram of PSO sample                                                                                                                                                                                 | pag. 7  |
| <b>Figure S6.</b> GC-MS chromatogram of unsaponifiable fraction of PSO sample.                                                                                                                                                       | pag. 8  |
| <b>Figure S7.</b> Mass spectra of squalene                                                                                                                                                                                           | pag. 9  |
| <b>Figure S8.</b> Mass spectra of $\gamma$ -tocopherol                                                                                                                                                                               | pag. 10 |
| <b>Figure S9.</b> Mass spectra of campesterol                                                                                                                                                                                        | pag. 11 |
| <b>Figure S10.</b> Mass spectra of stigmasterol                                                                                                                                                                                      | pag. 12 |
| <b>Figure S11.</b> Mass spectra of $\beta$ -Sitosterol                                                                                                                                                                               | pag. 13 |
| <b>Figure S12.</b> Mass spectra of lupeol                                                                                                                                                                                            | pag. 14 |
| <b>Figure S13.</b> Calibration curve of caffeic acid ranging from 25 to 150 $\mu$ g for the determination of total phenolic content by Folin Ciocalteu spectrophotometric assay using a UV-Visible spectrophotometer                 | pag. 15 |
| <b>Table S3.</b> Composition of unsaponifiable fraction expressed as range, means and SD                                                                                                                                             | pag. 16 |
| <b>Figure S14.</b> GC-FID chromatogram of FAMES in PSO-01 sample.                                                                                                                                                                    | pag. 17 |
| <b>Figure S15.</b> GC-FID chromatogram of FAMES in PSO-02 sample.                                                                                                                                                                    | pag. 18 |
| <b>Figure S16.</b> GC-FID chromatogram of FAMES in PSO-03 sample.                                                                                                                                                                    | pag. 19 |
| <b>Figure S17.</b> GC-FID chromatogram of FAMES in PSO-04 sample.                                                                                                                                                                    | pag. 20 |
| <b>Figure S18.</b> GC-FID chromatogram of FAMES in PSO-05 sample.                                                                                                                                                                    | pag. 21 |
| <b>Figure S19.</b> GC-FID chromatogram of FAMES in PSO-06 sample.                                                                                                                                                                    | pag. 22 |
| <b>Figure S20.</b> GC-FID chromatogram of FAMES in PSO-07 sample.                                                                                                                                                                    | pag. 23 |
| <b>Figure S21.</b> GC-FID chromatogram of FAMES in PSO-08 sample.                                                                                                                                                                    | pag. 24 |
| <b>Figure S22.</b> GC-FID chromatogram of FAMES in PSO-09 sample.                                                                                                                                                                    | pag. 25 |
| <b>Figure S23.</b> GC-FID chromatogram of FAMES in PSO-10 sample.                                                                                                                                                                    | pag. 26 |
| <b>Figure S24.</b> GC-FID chromatogram of FAMES in PSO-11 sample.                                                                                                                                                                    | pag. 27 |
| <b>Figure S25.</b> GC-FID chromatogram of FAMES in PSO-12 sample.                                                                                                                                                                    | pag. 28 |
| <b>Figure S26.</b> GC-FID chromatogram of FAMES in PSO-13 sample.                                                                                                                                                                    | pag. 29 |
| <b>Figure S27.</b> GC-FID chromatogram of FAMES in PSO-14 sample.                                                                                                                                                                    | pag. 30 |
| <b>Figure S28.</b> GC-FID chromatogram of FAMES in PSO-15 sample.                                                                                                                                                                    | pag. 31 |
| <b>Figure S29.</b> GC-FID chromatogram of FAMES in PSO-16 sample.                                                                                                                                                                    | pag. 32 |

|                                                                   |         |
|-------------------------------------------------------------------|---------|
| <b>Figure S30.</b> GC-FID chromatogram of FAMES in PSO-17 sample. | pag. 33 |
| <b>Figure S31.</b> GC-FID chromatogram of FAMES in PSO-18 sample. | pag. 34 |
| <b>Figure S32.</b> GC-FID chromatogram of FAMES in PSO-19 sample. | pag. 35 |
| <b>Figure S33.</b> GC-FID chromatogram of FAMES in PSO-20 sample. | pag. 36 |
| <b>Figure S34.</b> GC-FID chromatogram of FAMES in PSO-21 sample. | pag. 37 |
| <b>Figure S35.</b> GC-FID chromatogram of FAMES in PSO-22 sample. | pag. 38 |
| <b>Figure S36.</b> GC-FID chromatogram of FAMES in PSO-23 sample. | pag. 39 |
| <b>Figure S37.</b> GC-FID chromatogram of FAMES in PSO-24 sample. | pag. 40 |
| <b>Figure S38.</b> GC-FID chromatogram of FAMES in PSO-25 sample. | pag. 41 |
| <b>Figure S39.</b> GC-FID chromatogram of FAMES in PSO-26 sample. | pag. 42 |
| <b>Figure S40.</b> GC-FID chromatogram of FAMES in PSO-27 sample. | pag. 43 |
| <b>Figure S41.</b> GC-FID chromatogram of FAMES in PSO-28 sample. | pag. 44 |
| <b>Figure S42.</b> GC-FID chromatogram of FAMES in PSO-29 sample. | pag. 45 |
| <b>Figure S43.</b> GC-FID chromatogram of FAMES in PSO-30 sample. | pag. 46 |
| <b>Figure S44.</b> GC-FID chromatogram of FAMES in PSO-31 sample. | pag. 47 |
| <b>Figure S45.</b> GC-FID chromatogram of FAMES in PSO-32 sample. | pag. 48 |

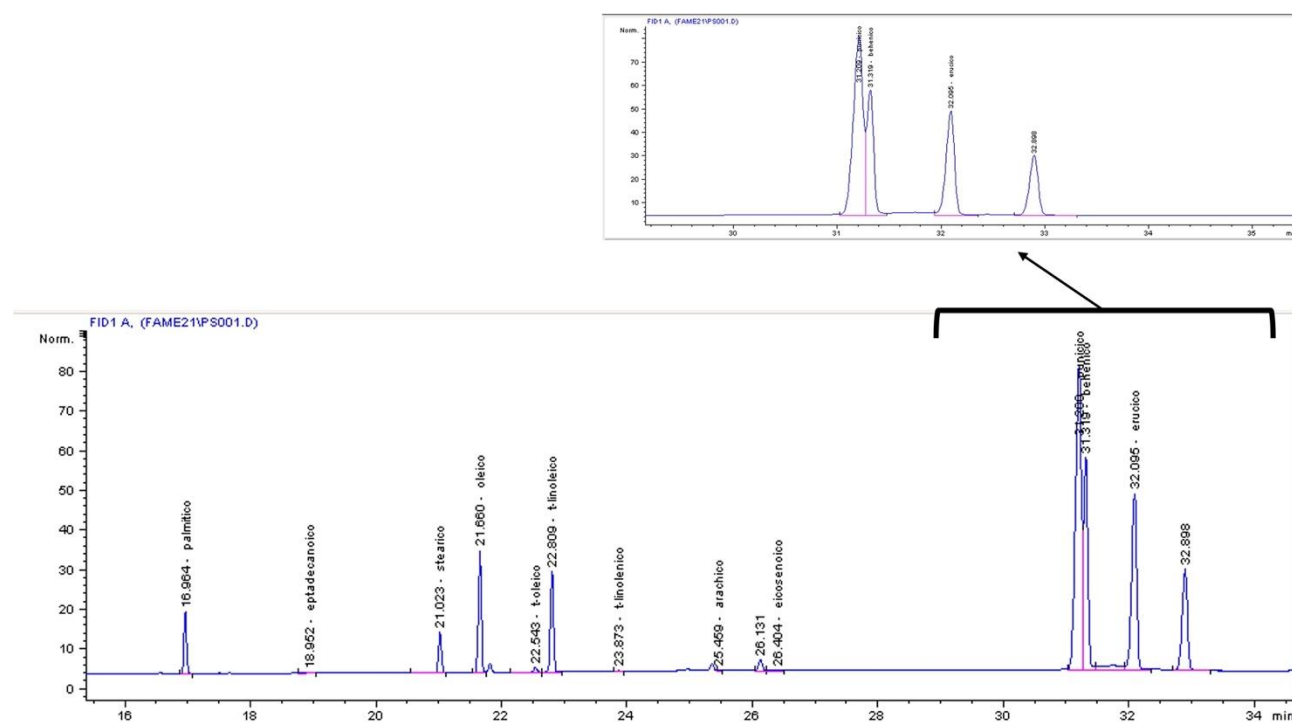

**Figure S1.** GC chromatogram of FAMES in PSO sample with a miniature of puniceic and behenic acids.

**Table S1.** Composition of fatty acids reported as relative percentage of peaks area.

| FAMES (%)          | Range      | Mean* | SD*  |
|--------------------|------------|-------|------|
| Palmitic Acid      | 2.13-4.42  | 3.07  | 0.52 |
| Heptadecanoic Acid | 0.02-0.24  | 0.05  | 0.07 |
| Stearic Acid       | 0.65-3.34  | 2.13  | 0.47 |
| Oleic Acid         | 0.56-19.95 | 5.91  | 3.88 |
| Elaidic Acid       | 0.09-5.03  | 0.39  | 0.89 |
| Unknown 1          | 0.00-0.55  | 0.15  | 0.19 |

|                  |             |       |       |
|------------------|-------------|-------|-------|
| Linoleic Acid    | 0.34-30.89  | 6.81  | 6.0   |
| Linoelaidic Acid | 0.01-1.61   | 0.13  | 0.31  |
| Arachidic Acid   | 0.13-4.19   | 0.61  | 0.67  |
| Eicosenoic Acid  | 0.18-2.94   | 0.84  | 0.61  |
| Punicic Acid     | 16.09-82.81 | 58.99 | 18.79 |
| Behenic Acid     | 0.34-27.71  | 7.82  | 7.01  |
| Erucic Acid      | 1.00-19.4   | 8.08  | 3.78  |
| Unknown 2        | 0.00-21.85  | 3.78  | 5.27  |
| Lignoceric Acid  | 0.04-7.1    | 0.79  | 1.35  |

\*Data are expressed as means and standard deviations (SD) of three independent observations.

**Table S2.** Retention time (min.), coefficient of determination ( $R^2$ ) and linear regression model of external standards used for tocopherols calibration, obtained by UV detector (220nm) (a) and fluorescence detector (b).

| <b>Tocopherols</b>                | <b>Rt (min.)</b> | <b><math>R^2</math></b> | <b>Linear regression</b>      |
|-----------------------------------|------------------|-------------------------|-------------------------------|
| $\delta$ -tocopherol <sup>a</sup> | 8.5              | 0.9932                  | $y=0.5883x+0.6729$            |
| $\gamma$ -tocopherol <sup>a</sup> | 10.7             | 0.9900                  | $y=0.8085x+1.6717$            |
| $\alpha$ -tocopherol <sup>a</sup> | 12.9             | 0.9905                  | $y=0.8694x+1.6009$            |
| $\delta$ -tocopherol <sup>b</sup> | 8.5              | 0.9687                  | $y=117304.1685x+6168285.0058$ |
| $\gamma$ -tocopherol <sup>b</sup> | 10.7             | 0.9944                  | $y=172639.3020x+3278101.7020$ |
| $\alpha$ -tocopherol <sup>b</sup> | 12.9             | 0.9825                  | $y=98113.3141x-1208544.1429$  |

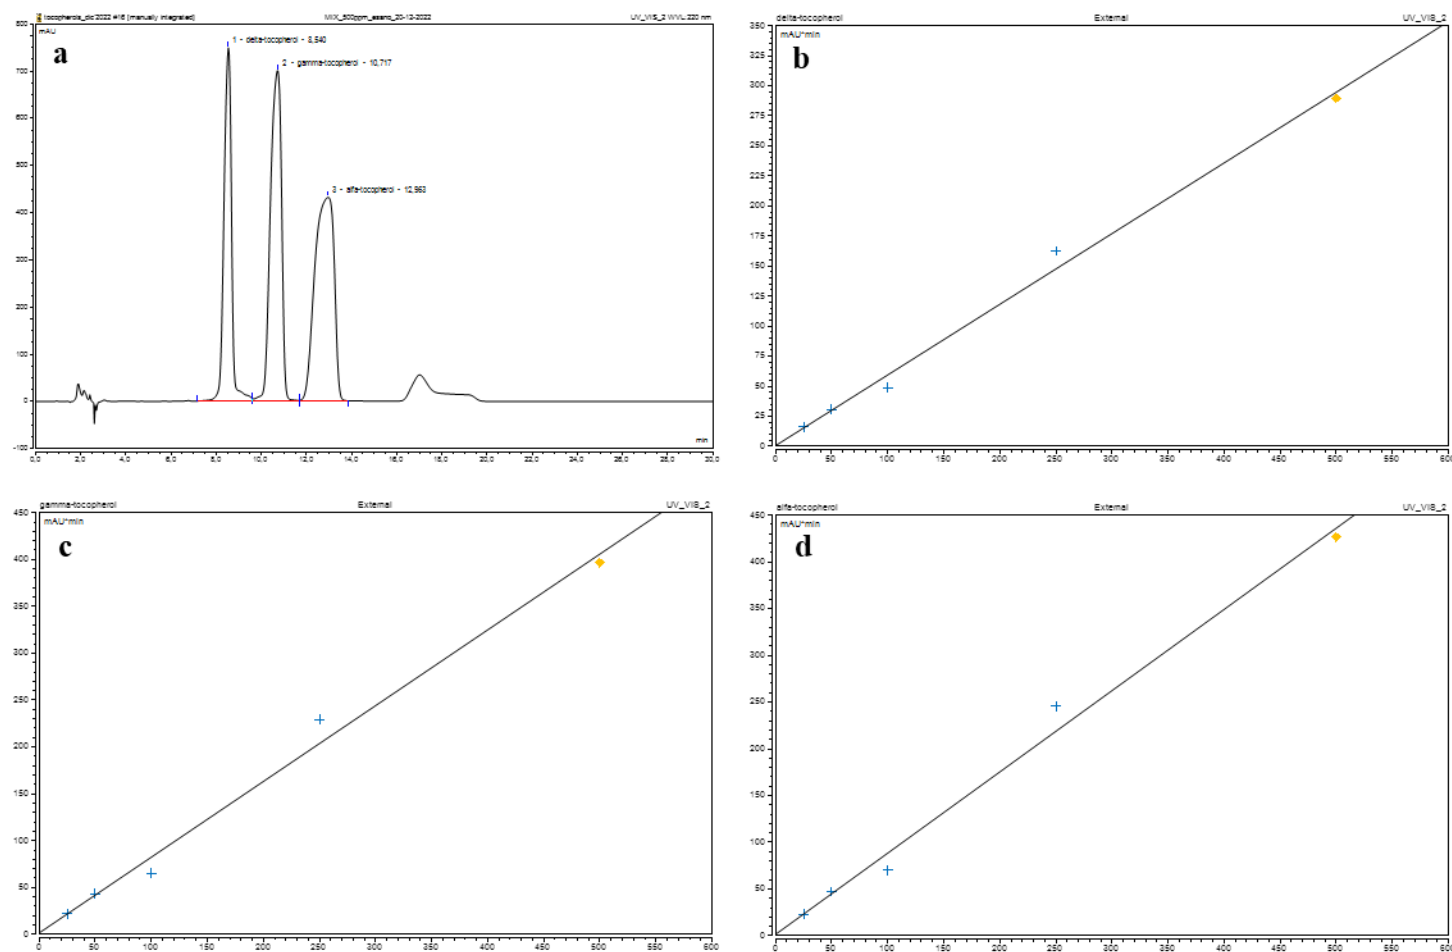

**Figure S2.** Chromatogram (a) and linear regression curve of  $\delta$ -tocopherol (b),  $\gamma$ -tocopherol (c) and  $\alpha$ -tocopherol (d) obtained by UV detector.

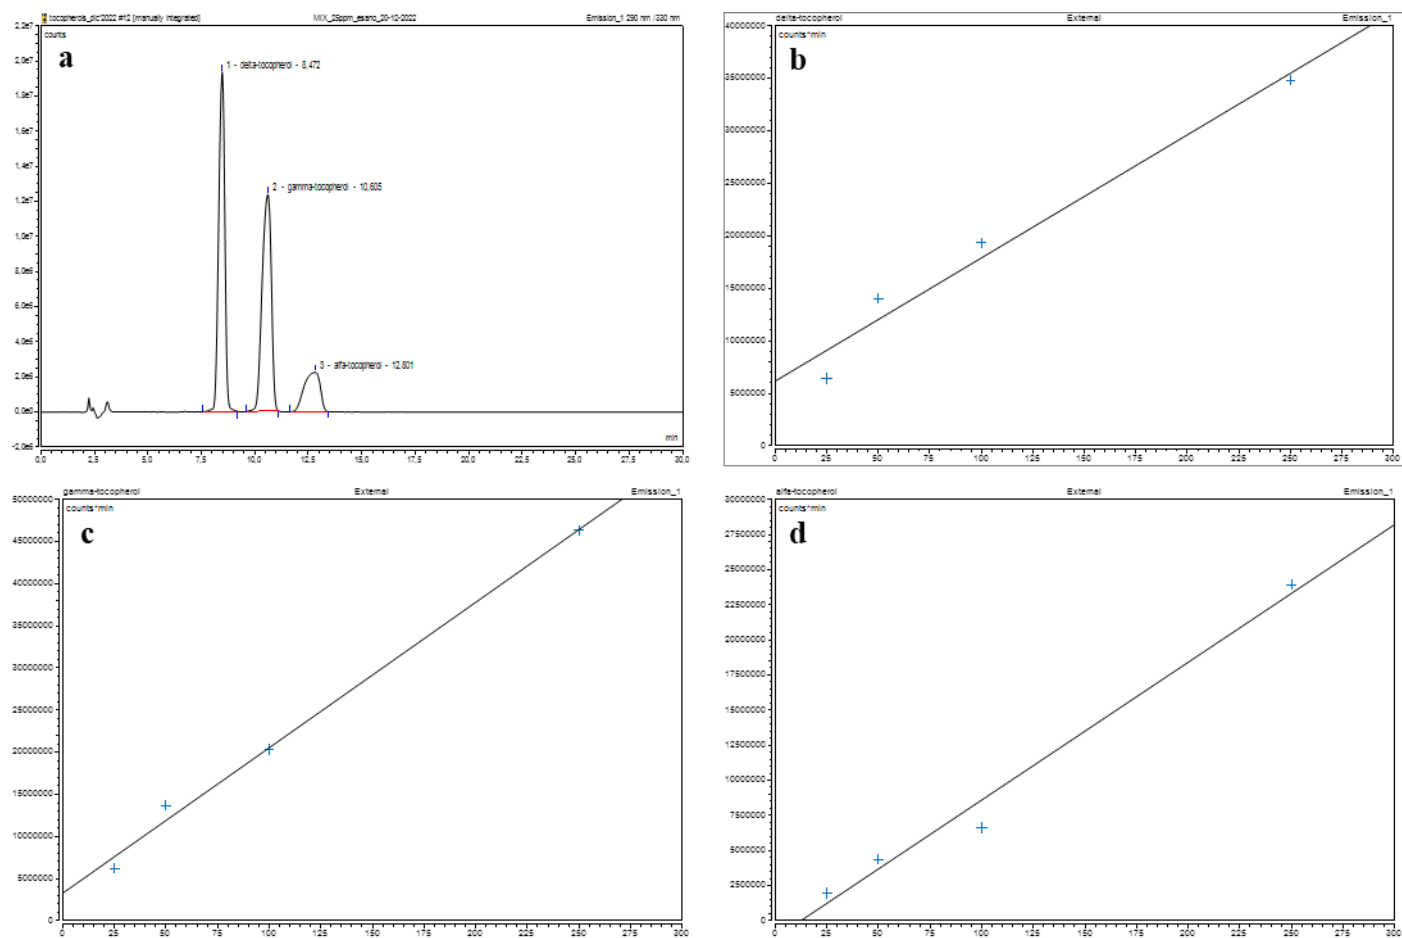

**Figure S3.** Chromatogram (a) and linear regression curve of  $\delta$ -tocopherol (b),  $\gamma$ -tocopherol (c) and  $\alpha$ -tocopherol (d) obtained by fluorescence detector.

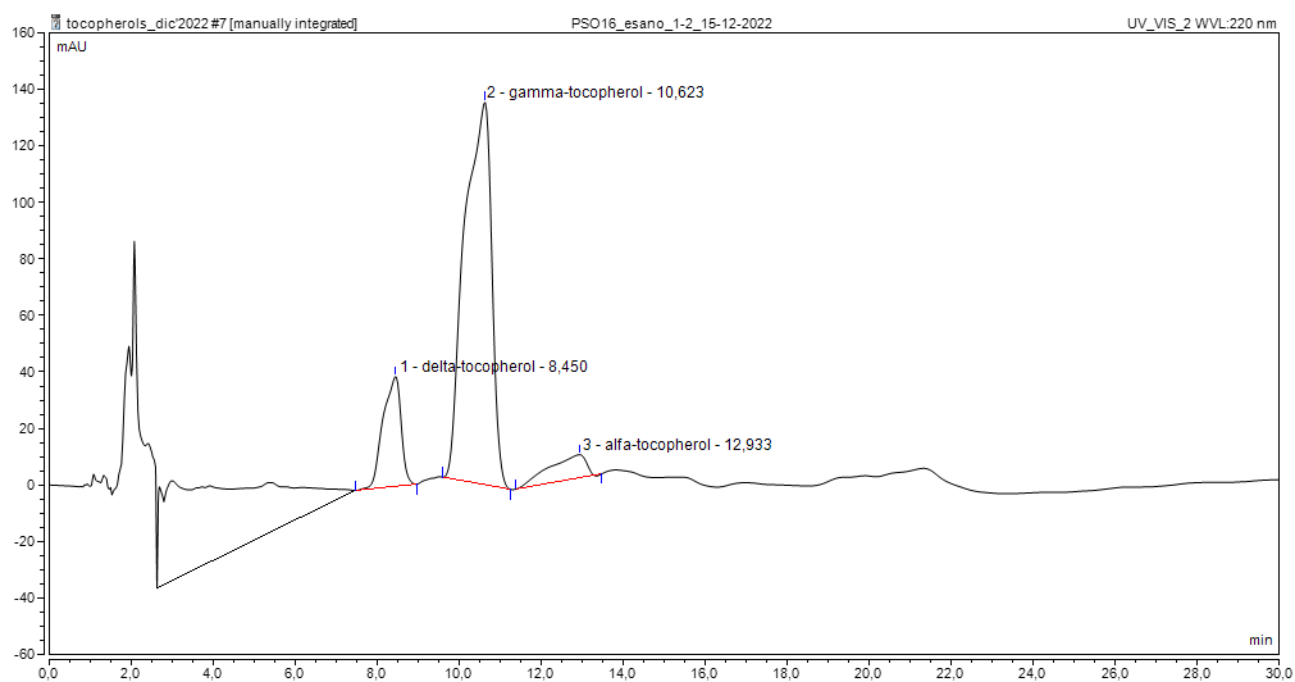

**Figure S4.** HPLC-UV chromatogram of PSO sample.

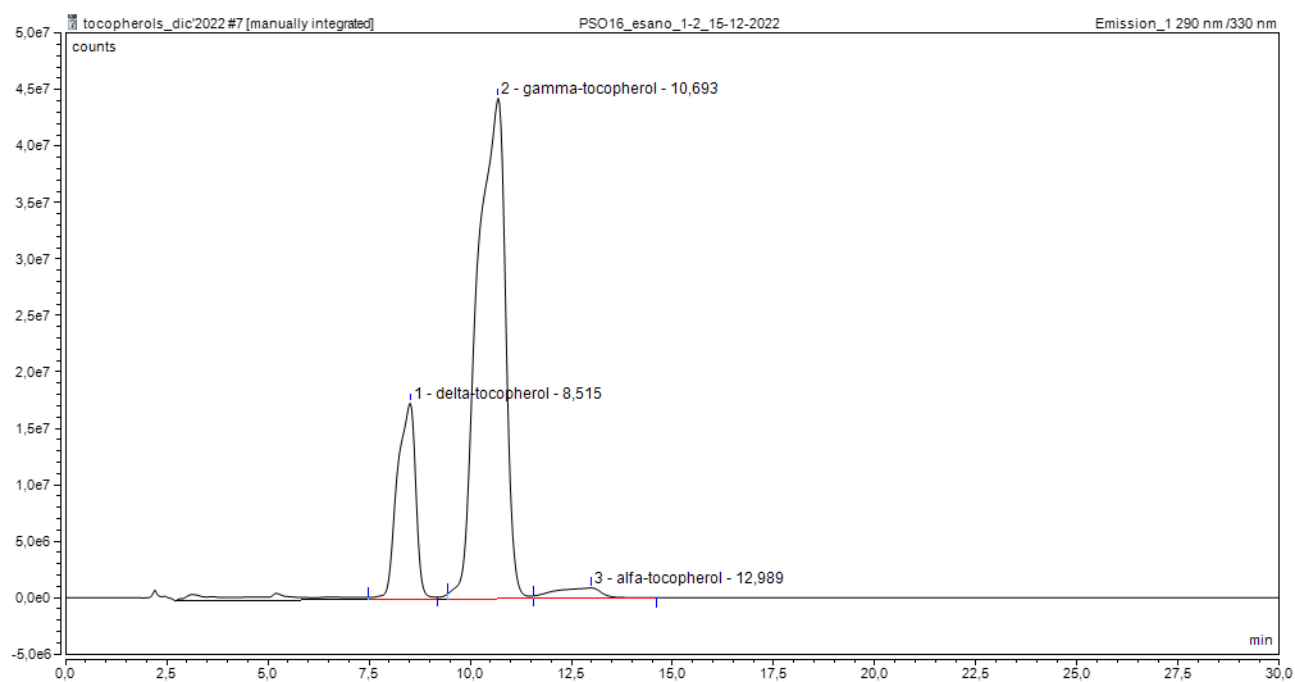

**Figure S5.** HPLC-UV chromatogram of PSO sample.

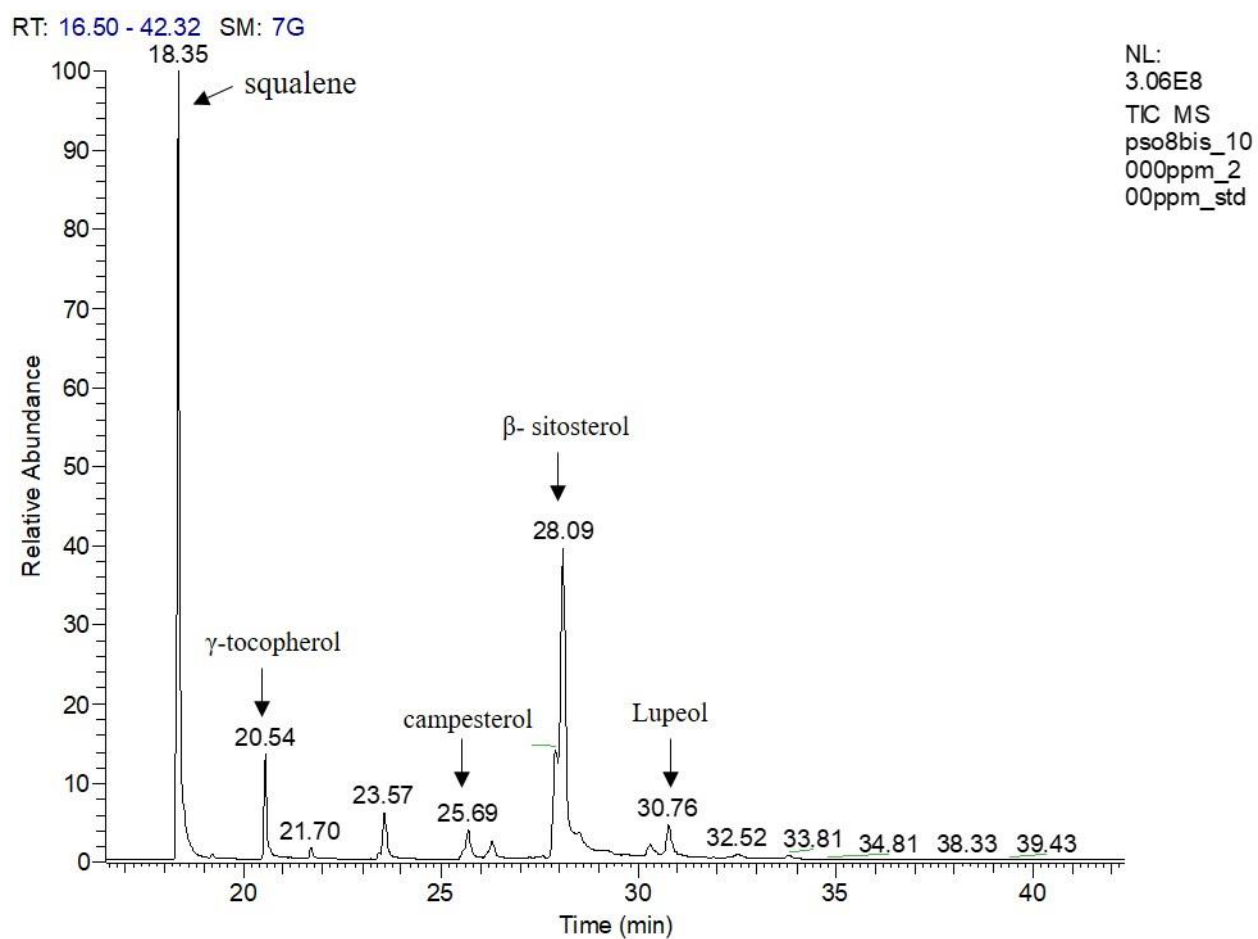

**Figure S6.** GC-MS chromatogram of unsaponifiable fraction of PSO sample.

pso8bis\_10000ppm\_200ppm\_std #771 RT: 18.33 AV: 1 NL: 9.89E7  
T: + c Full ms [50.00-500.00]

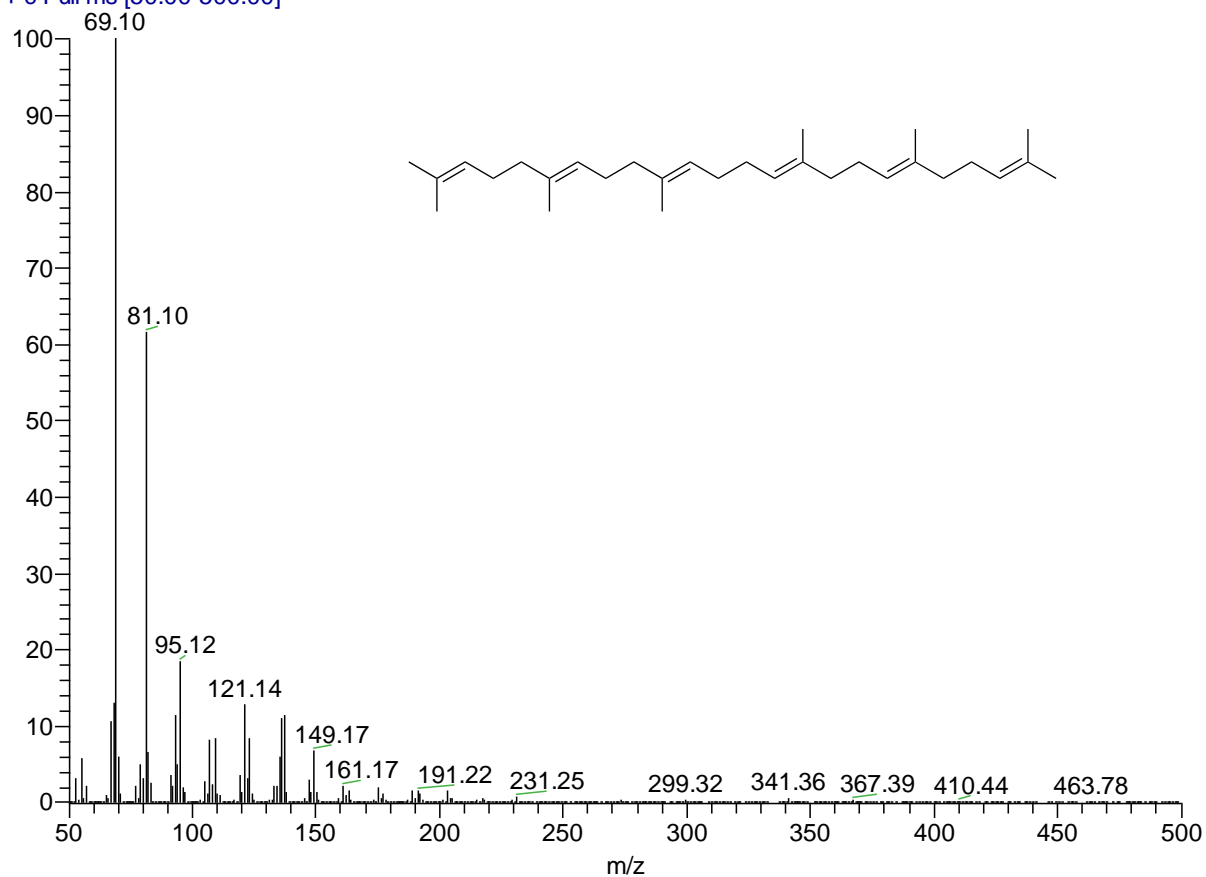

**Figure S7.** Mass spectra of Squalene (RT 18.33).



T: + c Full ms [50.00-500.00]

NL: 9.96E6

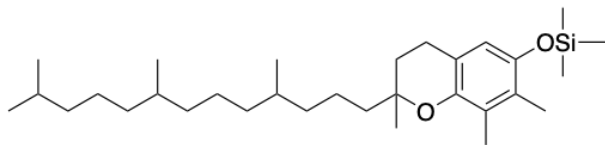

**Figure S8.** Mass spectra of  $\gamma$ -Tocopherol (RT 20.54).

pso8bis\_10000ppm\_200ppm\_std #1248 RT: 25.6  
T: + c Full ms [50.00-500.00]

I SB: 300 22.50-25.40 , 26.08-27.75 NL: 6.48E5

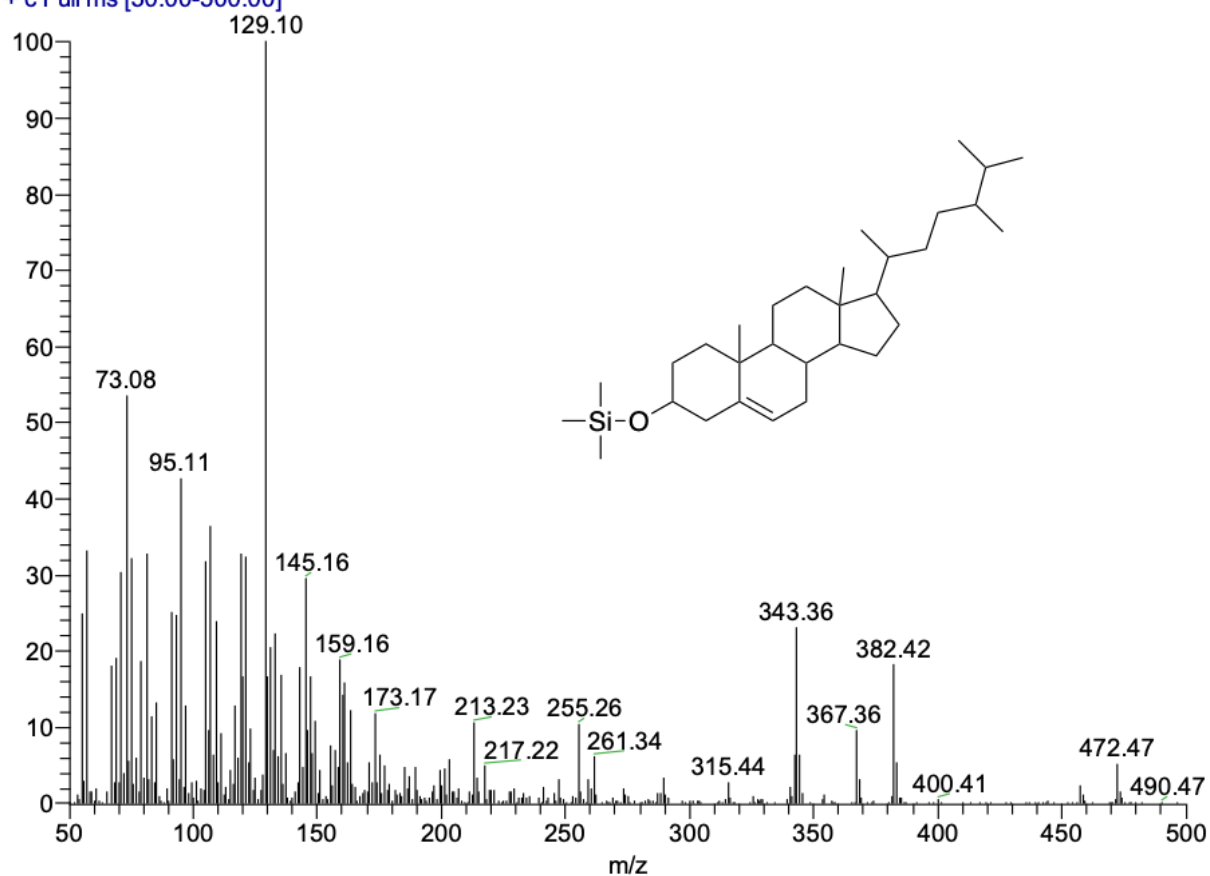

**Figure S9.** Mass spectra of Campesterol (RT 25.69).

pso8bis\_10000ppm\_200ppm\_std #1289 RT: 26.2'  
T: + c Full ms [50.00-500.00]

I SB: 300 22.50-25.40 , 26.08-27.75 NL: 5.82E5

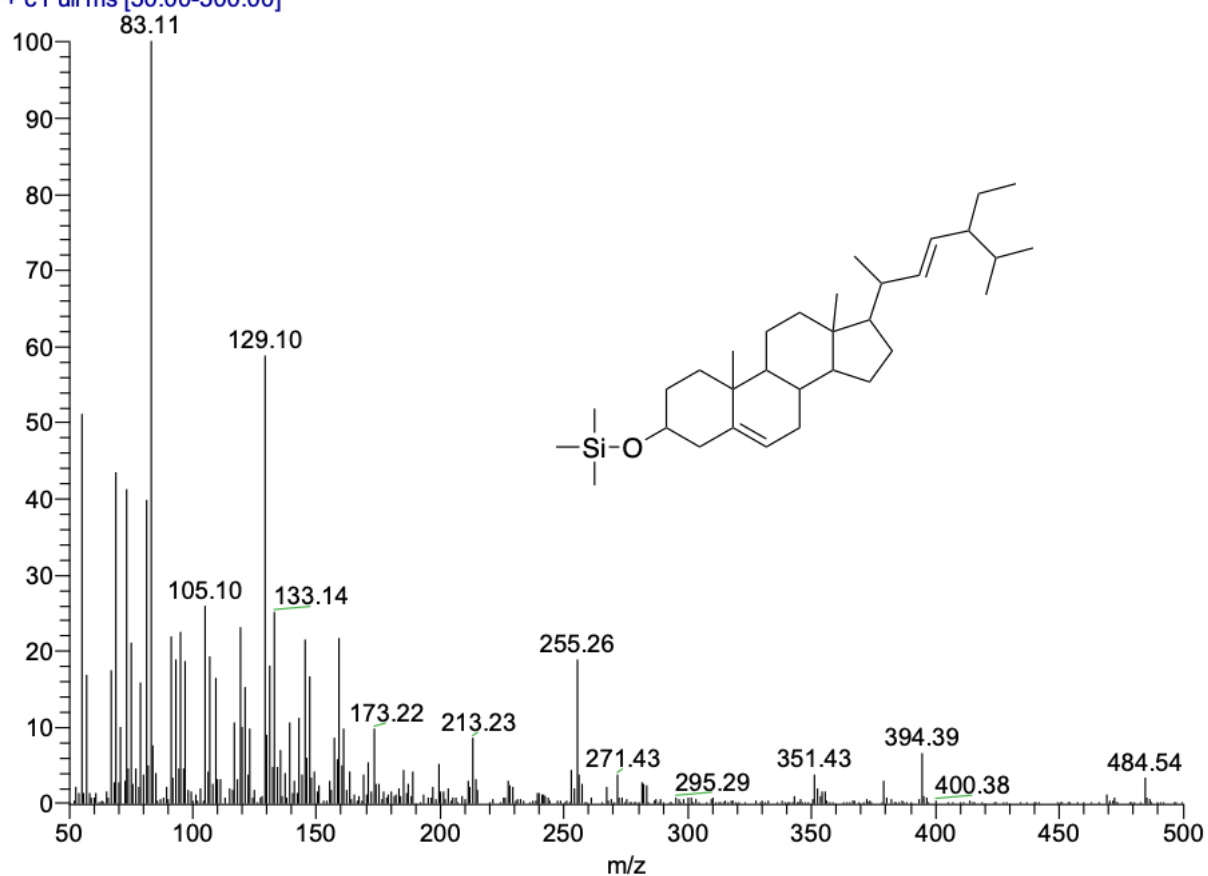

**Figure S10.** Mass spectra of Stigmasterol (RT 26.29).

pso8bis\_10000ppm\_200ppm\_std #1398-1409 RT  
T: + c Full ms [50.00-500.00]

28.14 AV: 12 SB: 300 22.50-25.40 , 26.08-27.75

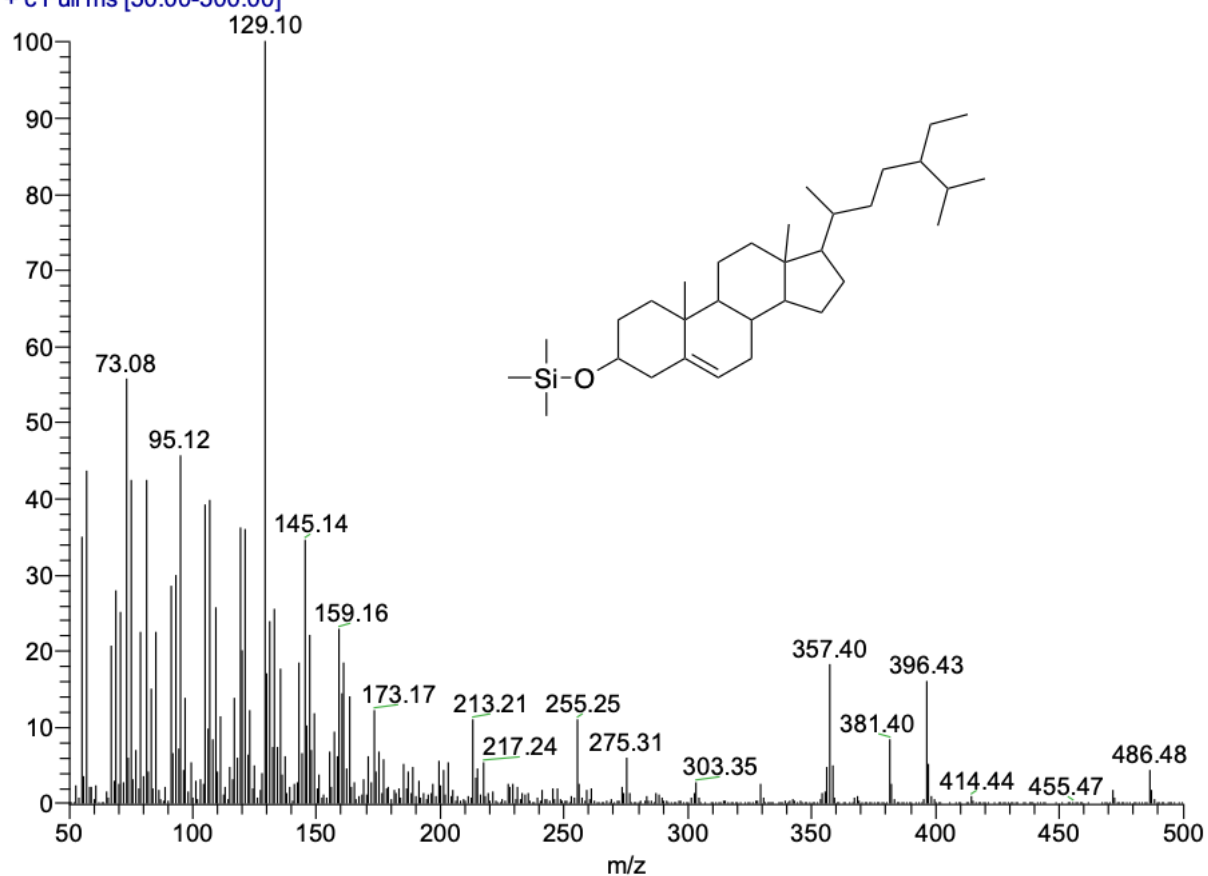

**Figure S11.** Mass spectra of  $\beta$ -Sitosterol (RT 28.14).

pso8bis\_10000ppm\_200ppm\_std #1581 RT: 30.76  
T: + c Full ms [50.00-500.00]

I SB: 300 22.50-25.40 , 26.08-27.75 NL: 5.59E5

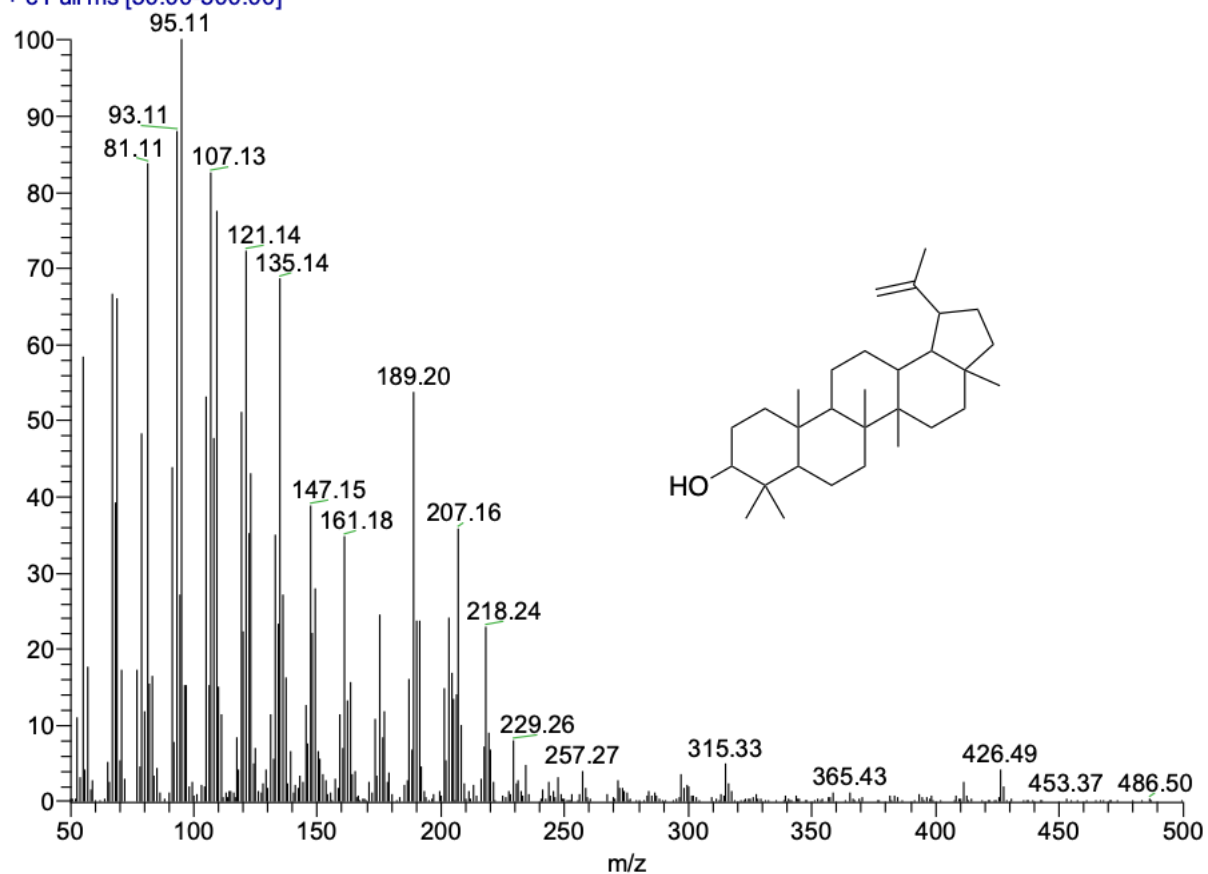

**Figure S12.** Mass spectra of Lupeol (RT 30.76).

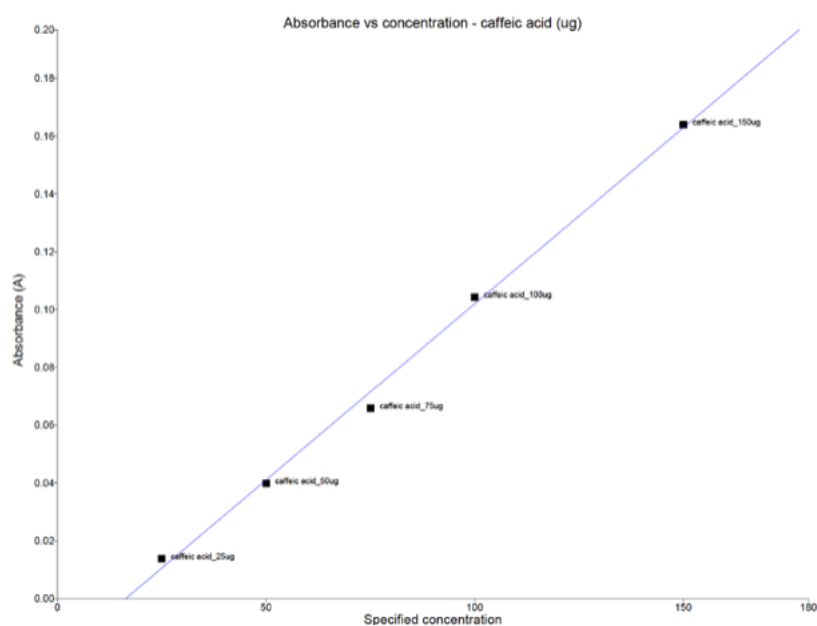

**Figure S13.** Calibration curve of caffeic acid ranging from 25 to 150  $\mu\text{g}$  for the determination of total phenolic content by Folin Ciocalteu spectrophotometric assay using a UV-visible spectrophotometer.

**Table S3.** Composition of unsaponifiable fraction reported as mg kg<sup>-1</sup>.

| Unsaponifiable fraction (mg kg <sup>-1</sup> ) | Range          | Mean*   | SD*     |
|------------------------------------------------|----------------|---------|---------|
| Squalene                                       | 393.09-3100.19 | 1318.59 | 692.06  |
| δ-Tocopherol                                   | 5.6-2361.17    | 353.09  | 520.75  |
| γ-Tocopherol                                   | 5.5-4073.98    | 1709.21 | 1091.95 |
| Total tocopherols                              | 11.1-6435.15   | 2062.30 | 1563.36 |
| Campesterol                                    | 53.72-386.92   | 215.48  | 77.42   |
| Stigmasterol                                   | 34.43-267.94   | 144.04  | 51.97   |
| β-Sitosterol                                   | 444.5-3593.56  | 1839.69 | 718.10  |
| Lupeol                                         | 60.17-570.85   | 262.80  | 118.04  |

\*Data expressed as means and standard deviations (SD) of three independent observations.

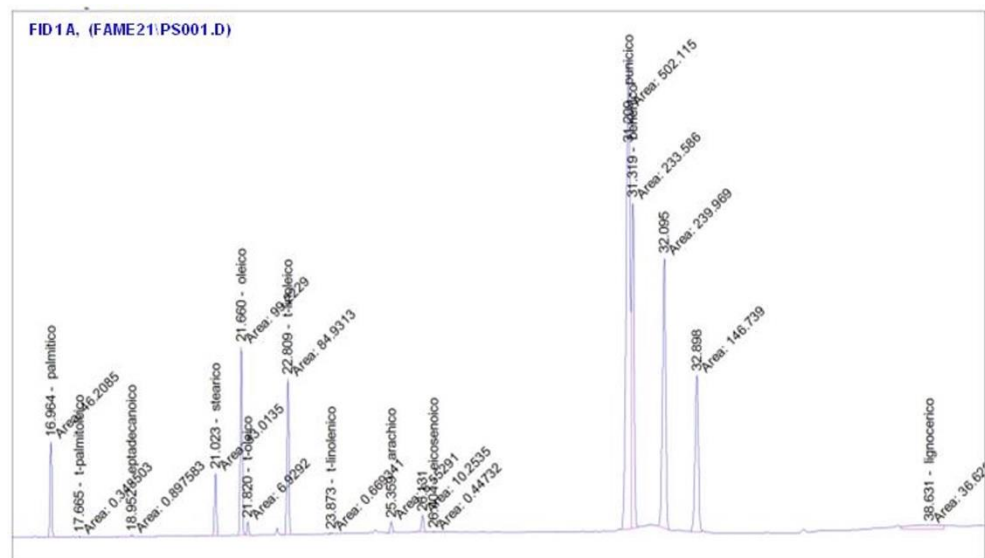

Signal 1: FID1 A,

| Peak # | RetTime [min] | Type | Width [min] | Area [pA*s] | Area %   | Name           |
|--------|---------------|------|-------------|-------------|----------|----------------|
| 1      | 13.454        |      | 0.0000      | 0.00000     | 0.00000  | miristico      |
| 2      | 16.964        | MM   | 0.0490      | 46.20851    | 3.19008  | palmitico      |
| 3      | 17.665        | MM   | 0.0484      | 3.48503e-1  | 0.02406  | t-palmitoleico |
| 4      | 17.931        |      | 0.0000      | 0.00000     | 0.00000  | palmitoleico   |
| 5      | 18.952        | MM   | 0.0529      | 8.97583e-1  | 0.06197  | eptadecanoico  |
| 6      | 19.781        |      | 0.0000      | 0.00000     | 0.00000  | eptadecenoico  |
| 7      | 21.023        | MM   | 0.0535      | 33.01353    | 2.27914  | stearico       |
| 8      | 21.660        | MM   | 0.0536      | 99.22294    | 6.85002  | oleico         |
| 9      | 21.820        | MM   | 0.0524      | 6.92920     | 0.47837  | t-oleico       |
| 10     | 22.183        |      | 0.0000      | 0.00000     | 0.00000  | t-oleico       |
| 11     | 22.809        | MM   | 0.0556      | 84.93127    | 5.86337  | t-linoleico    |
| 12     | 23.059        |      | 0.0000      | 0.00000     | 0.00000  | linoleico      |
| 13     | 23.873        | MM   | 0.0618      | 6.69341e-1  | 0.04621  | t-linolenico   |
| 14     | 24.443        |      | 0.0000      | 0.00000     | 0.00000  | linolenico     |
| 15     | 25.359        | MM   | 0.0619      | 6.55291     | 0.45239  | arachico       |
| 16     | 26.131        | MM   | 0.0634      | 10.25350    | 0.70787  | ?              |
| 17     | 26.404        | MM   | 0.0682      | 4.47320e-1  | 0.03088  | eicosenoico    |
| 18     | 31.209        | MF   | 0.1092      | 502.11542   | 34.66438 | punico         |
| 19     | 31.319        | FM   | 0.0732      | 233.58627   | 16.12602 | behenico       |
| 20     | 32.095        | MM   | 0.0907      | 239.96936   | 16.56669 | ?              |
| 21     | 32.898        | MM   | 0.0958      | 146.73863   | 10.13035 | ?              |
| 22     | 38.631        | MM   | 0.9263      | 36.62093    | 2.52819  | lignocericico  |

**Figure S14.** GC-FID chromatogram of FAMES in PSO-01 sample.



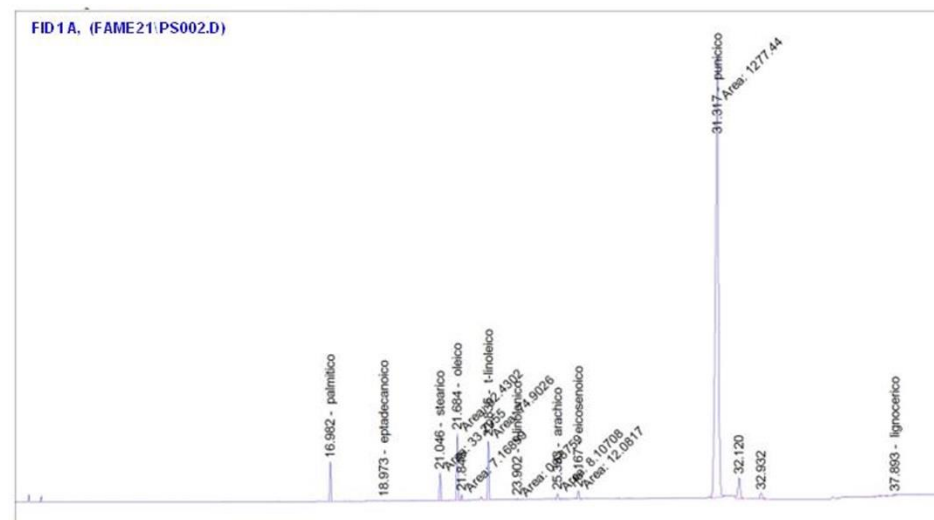

Signal 1: FID1 A,

| Peak # | RetTime [min] | Type | Width [min] | Area [pA*s] | Area %   | Name           |
|--------|---------------|------|-------------|-------------|----------|----------------|
| 1      | 13.454        |      | 0.0000      | 0.00000     | 0.00000  | miristico      |
| 2      | 16.982        | VB   | 0.0470      | 45.18716    | 2.80900  | palmitico      |
| 3      | 17.520        |      | 0.0000      | 0.00000     | 0.00000  | t-palmitoleico |
| 4      | 17.931        |      | 0.0000      | 0.00000     | 0.00000  | palmitoleico   |
| 5      | 18.973        | VP   | 0.0497      | 9.82363e-1  | 0.06107  | eptadecanoico  |
| 6      | 19.781        |      | 0.0000      | 0.00000     | 0.00000  | eptadecenoico  |
| 7      | 21.046        | MM   | 0.0523      | 33.29555    | 2.06977  | stearico       |
| 8      | 21.500        |      | 0.0000      | 0.00000     | 0.00000  | t-oleico       |
| 9      | 21.684        | MM   | 0.0537      | 82.43022    | 5.12416  | oleico         |
| 10     | 21.846        | MM   | 0.0535      | 7.16899     | 0.44565  | ?              |
| 11     | 22.183        |      | 0.0000      | 0.00000     | 0.00000  | t-oleico       |
| 12     | 22.835        | MM   | 0.0549      | 74.90265    | 4.65622  | t-linoleico    |
| 13     | 23.059        |      | 0.0000      | 0.00000     | 0.00000  | linoleico      |
| 14     | 23.902        | MM   | 0.0568      | 6.87590e-1  | 0.04274  | t-linolenico   |
| 15     | 24.443        |      | 0.0000      | 0.00000     | 0.00000  | linolenico     |
| 16     | 25.393        | MM   | 0.0646      | 8.10708     | 0.50396  | arachico       |
| 17     | 26.167        | MM   | 0.0659      | 12.08170    | 0.75104  | eicosenoico    |
| 18     | 31.226        |      | 0.0000      | 0.00000     | 0.00000  | behenico       |
| 19     | 31.317        | MM   | 0.1259      | 1277.44458  | 79.41052 | punico         |
| 20     | 32.120        | VB   | 0.0923      | 48.26136    | 3.00010  | ?              |
| 21     | 32.932        | BP   | 0.0948      | 13.69370    | 0.85125  | ?              |
| 22     | 37.893        | VV   | 0.1929      | 4.41626     | 0.27453  | lignocericico  |

**Figure S15.** GC-FID chromatogram of FAMES in PSO-02 sample.

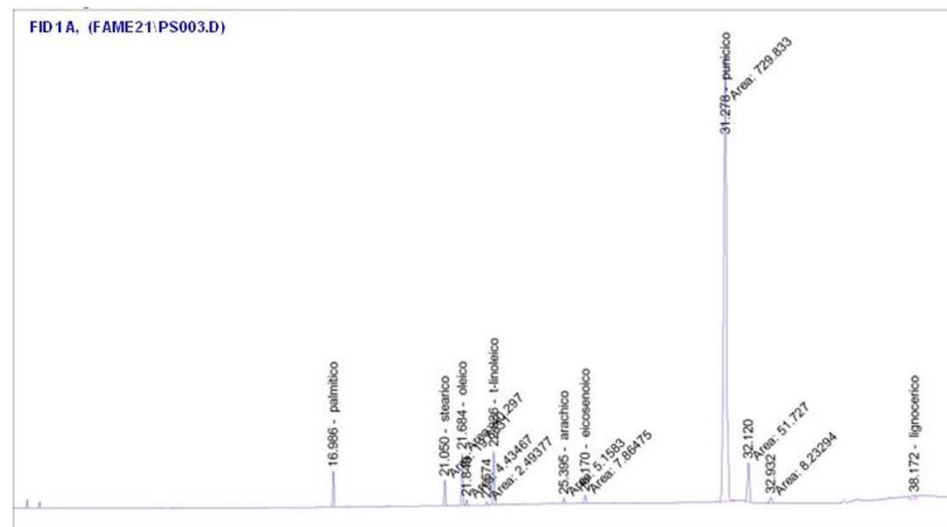

| Peak # | RetTime [min] | Type | Width [min] | Area [pA*s] | Area %   | Name           |
|--------|---------------|------|-------------|-------------|----------|----------------|
| 1      | 13.454        |      | 0.0000      | 0.00000     | 0.00000  | miristico      |
| 2      | 16.986        | PB   | 0.0473      | 25.96648    | 2.73499  | palmitico      |
| 3      | 17.520        |      | 0.0000      | 0.00000     | 0.00000  | t-palmitoleico |
| 4      | 17.931        |      | 0.0000      | 0.00000     | 0.00000  | palmitoleico   |
| 5      | 19.107        |      | 0.0000      | 0.00000     | 0.00000  | eptadecanoico  |
| 6      | 19.781        |      | 0.0000      | 0.00000     | 0.00000  | eptadecenoico  |
| 7      | 21.050        | MM   | 0.0528      | 19.66308    | 2.07107  | stearico       |
| 8      | 21.500        |      | 0.0000      | 0.00000     | 0.00000  | t-oleico       |
| 9      | 21.684        | MM   | 0.0541      | 40.29704    | 4.24440  | oleico         |
| 10     | 21.849        | MM   | 0.0559      | 4.43467     | 0.46709  | ?              |
| 11     | 22.183        |      | 0.0000      | 0.00000     | 0.00000  | t-oleico       |
| 12     | 22.574        | MM   | 0.0563      | 2.49377     | 0.26266  | ?              |
| 13     | 22.836        | BB   | 0.0505      | 42.20690    | 4.44556  | t-linoleico    |
| 14     | 23.059        |      | 0.0000      | 0.00000     | 0.00000  | linoleico      |
| 15     | 24.060        |      | 0.0000      | 0.00000     | 0.00000  | t-linolenico   |
| 16     | 24.443        |      | 0.0000      | 0.00000     | 0.00000  | linolenico     |
| 17     | 25.395        | MM   | 0.0645      | 5.15830     | 0.54331  | arachico       |
| 18     | 26.170        | MM   | 0.0673      | 7.86475     | 0.82838  | eicosenoico    |
| 19     | 31.226        |      | 0.0000      | 0.00000     | 0.00000  | behenico       |
| 20     | 31.278        | MM   | 0.1138      | 729.83264   | 76.87162 | punicico       |
| 21     | 32.120        | MM   | 0.0911      | 51.72702    | 5.44829  | ?              |
| 22     | 32.932        | MM   | 0.0996      | 8.23294     | 0.86716  | ?              |
| 23     | 38.172        | VV   | 0.1996      | 11.53990    | 1.21547  | lignocerico    |

**Figure S16.** GC-FID chromatogram of FAMES in PSO-03 sample.

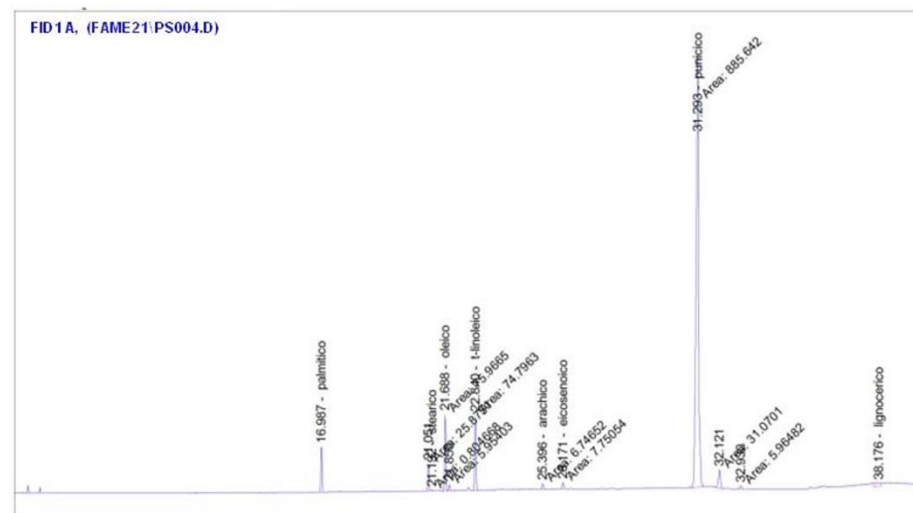

Signal 1: FID1 A,

| Peak # | RetTime [min] | Type | Width [min] | Area [pA*s] | Area %   | Name           |
|--------|---------------|------|-------------|-------------|----------|----------------|
| 1      | 13.454        |      | 0.0000      | 0.00000     | 0.00000  | miristico      |
| 2      | 16.987        | VB   | 0.0445      | 40.97486    | 3.48047  | palmitico      |
| 3      | 17.520        |      | 0.0000      | 0.00000     | 0.00000  | t-palmitoleico |
| 4      | 17.931        |      | 0.0000      | 0.00000     | 0.00000  | palmitoleico   |
| 5      | 19.107        |      | 0.0000      | 0.00000     | 0.00000  | eptadecanoico  |
| 6      | 19.781        |      | 0.0000      | 0.00000     | 0.00000  | eptadecenoico  |
| 7      | 21.051        | MM   | 0.0525      | 25.87514    | 2.19788  | ?              |
| 8      | 21.192        | MM   | 0.0545      | 8.04668e-1  | 0.06835  | stearico       |
| 9      | 21.500        |      | 0.0000      | 0.00000     | 0.00000  | t-oleico       |
| 10     | 21.688        | MM   | 0.0547      | 75.96647    | 6.45271  | oleico         |
| 11     | 21.850        | MM   | 0.0541      | 5.95403     | 0.50574  | ?              |
| 12     | 22.183        |      | 0.0000      | 0.00000     | 0.00000  | t-oleico       |
| 13     | 22.840        | MM   | 0.0552      | 74.79631    | 6.35332  | t-linoleico    |
| 14     | 23.059        |      | 0.0000      | 0.00000     | 0.00000  | linoleico      |
| 15     | 24.060        |      | 0.0000      | 0.00000     | 0.00000  | t-linolenico   |
| 16     | 24.443        |      | 0.0000      | 0.00000     | 0.00000  | linolenico     |
| 17     | 25.396        | MM   | 0.0661      | 6.74652     | 0.57306  | arachico       |
| 18     | 26.171        | MM   | 0.0651      | 7.75054     | 0.65834  | eicosenoico    |
| 19     | 31.226        |      | 0.0000      | 0.00000     | 0.00000  | behenico       |
| 20     | 31.293        | MM   | 0.1130      | 885.64154   | 75.22781 | punico         |
| 21     | 32.121        | MM   | 0.0937      | 31.07008    | 2.63914  | ?              |
| 22     | 32.930        | MM   | 0.1046      | 5.96482     | 0.50666  | ?              |
| 23     | 38.176        | VV   | 0.2075      | 15.73449    | 1.33651  | lignocericico  |

**Figure S17.** GC-FID chromatogram of FAMEs in PSO-04 sample.

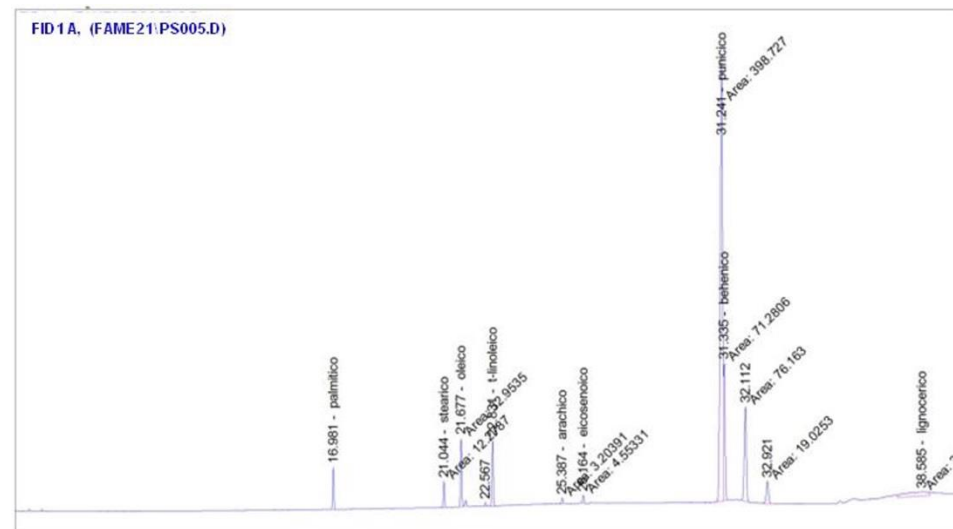

| Peak # | RetTime [min] | Type | Width [min] | Area [pA*s] | Area %   | Name           |
|--------|---------------|------|-------------|-------------|----------|----------------|
| 1      | 13.454        |      | 0.0000      | 0.00000     | 0.00000  | miristico      |
| 2      | 16.981        | PV   | 0.0469      | 18.34941    | 2.59015  | palmitico      |
| 3      | 17.520        |      | 0.0000      | 0.00000     | 0.00000  | t-palmitoleico |
| 4      | 17.931        |      | 0.0000      | 0.00000     | 0.00000  | palmitoleico   |
| 5      | 19.107        |      | 0.0000      | 0.00000     | 0.00000  | eptadecanoico  |
| 6      | 19.781        |      | 0.0000      | 0.00000     | 0.00000  | eptadecenoico  |
| 7      | 21.044        | MM   | 0.0526      | 12.27873    | 1.73323  | stearico       |
| 8      | 21.500        |      | 0.0000      | 0.00000     | 0.00000  | t-oleico       |
| 9      | 21.677        | MM   | 0.0547      | 32.95350    | 4.65162  | oleico         |
| 10     | 22.183        |      | 0.0000      | 0.00000     | 0.00000  | t-oleico       |
| 11     | 22.567        | BV   | 0.0602      | 2.06351     | 0.29128  | ?              |
| 12     | 22.831        | VB   | 0.0512      | 31.97880    | 4.51403  | t-linoleico    |
| 13     | 23.059        |      | 0.0000      | 0.00000     | 0.00000  | linoleico      |
| 14     | 24.060        |      | 0.0000      | 0.00000     | 0.00000  | t-linolenico   |
| 15     | 24.443        |      | 0.0000      | 0.00000     | 0.00000  | linolenico     |
| 16     | 25.387        | MM   | 0.0623      | 3.20391     | 0.45225  | arachico       |
| 17     | 26.164        | MM   | 0.0641      | 4.55331     | 0.64273  | eicosenoico    |
| 18     | 31.241        | MF   | 0.1014      | 398.72745   | 56.28321 | punicico       |
| 19     | 31.335        | FM   | 0.0590      | 71.28056    | 10.06176 | behenico       |
| 20     | 32.112        | MM   | 0.0917      | 76.16296    | 10.75094 | ?              |
| 21     | 32.921        | MM   | 0.0965      | 19.02531    | 2.68556  | ?              |
| 22     | 38.585        | MM   | 1.0498      | 37.85308    | 5.34323  | lignocericico  |

**Figure S18.** GC-FID chromatogram of FAMEs in PSO-05 sample.

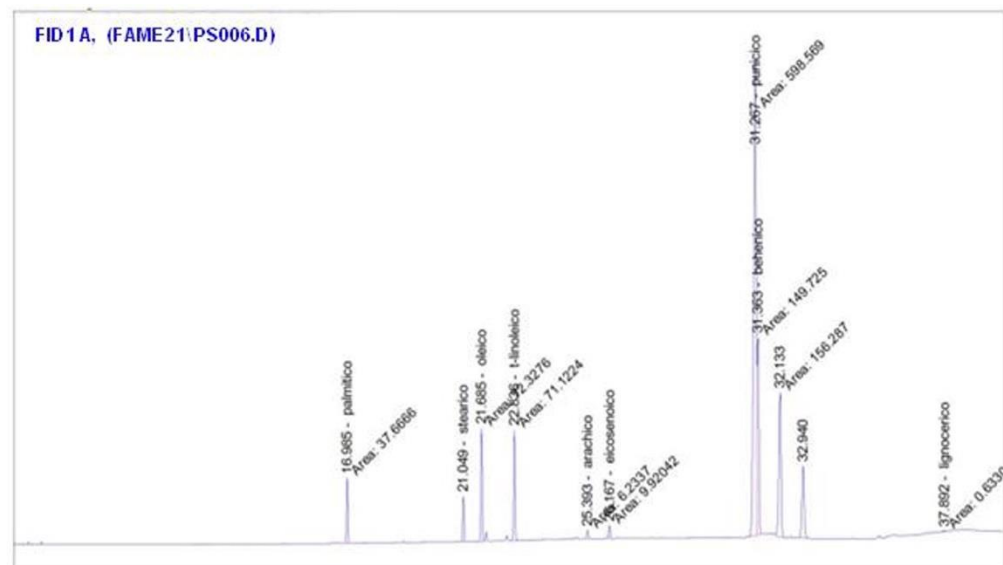

Signal 1: FID1 A,

| Peak # | RetTime [min] | Type | Width [min] | Area [pA*s] | Area %   | Name           |
|--------|---------------|------|-------------|-------------|----------|----------------|
| 1      | 13.454        |      | 0.0000      | 0.00000     | 0.00000  | miristico      |
| 2      | 16.985        | MM   | 0.0491      | 37.66658    | 3.10945  | palmitico      |
| 3      | 17.520        |      | 0.0000      | 0.00000     | 0.00000  | t-palmitoleico |
| 4      | 17.931        |      | 0.0000      | 0.00000     | 0.00000  | palmitoleico   |
| 5      | 19.107        |      | 0.0000      | 0.00000     | 0.00000  | eptadecanoico  |
| 6      | 19.781        |      | 0.0000      | 0.00000     | 0.00000  | eptadecenoico  |
| 7      | 21.049        | PB   | 0.0498      | 28.35135    | 2.34046  | stearico       |
| 8      | 21.500        |      | 0.0000      | 0.00000     | 0.00000  | t-oleico       |
| 9      | 21.685        | MM   | 0.0549      | 72.32762    | 5.97078  | oleico         |
| 10     | 22.183        |      | 0.0000      | 0.00000     | 0.00000  | t-oleico       |
| 11     | 22.836        | MM   | 0.0550      | 71.12236    | 5.87128  | t-linoleico    |
| 12     | 23.059        |      | 0.0000      | 0.00000     | 0.00000  | linoleico      |
| 13     | 24.060        |      | 0.0000      | 0.00000     | 0.00000  | t-linolenico   |
| 14     | 24.443        |      | 0.0000      | 0.00000     | 0.00000  | linolenico     |
| 15     | 25.393        | MM   | 0.0625      | 6.23370     | 0.51460  | arachico       |
| 16     | 26.167        | MM   | 0.0658      | 9.92042     | 0.81895  | eicosenoico    |
| 17     | 31.267        | MF   | 0.1081      | 598.56866   | 49.41296 | punicoico      |
| 18     | 31.363        | FM   | 0.0651      | 149.72479   | 12.36006 | behenico       |
| 19     | 32.133        | MM   | 0.0932      | 156.28687   | 12.90177 | ?              |
| 20     | 32.940        | BV   | 0.0896      | 80.52434    | 6.64743  | ?              |
| 21     | 37.892        | MM   | 0.0734      | 6.33003e-1  | 0.05226  | lignocericico  |

**Figure S19.** GC-FID chromatogram of FAMES in PSO-06 sample.

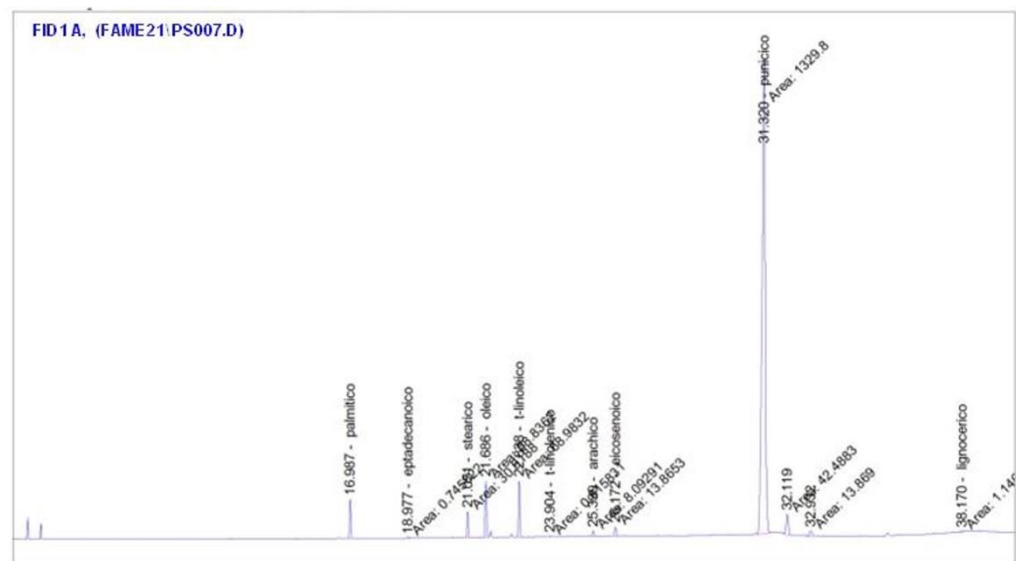

Signal 1: FID1 A,

| Peak # | RetTime [min] | Type | Width [min] | Area [pA*s] | Area %   | Name           |
|--------|---------------|------|-------------|-------------|----------|----------------|
| 1      | 13.454        |      | 0.0000      | 0.00000     | 0.00000  | miristico      |
| 2      | 16.987        | VV   | 0.0446      | 43.48398    | 2.67948  | palmitico      |
| 3      | 17.520        |      | 0.0000      | 0.00000     | 0.00000  | t-palmitoleico |
| 4      | 17.931        |      | 0.0000      | 0.00000     | 0.00000  | palmitoleico   |
| 5      | 18.977        | MM   | 0.0492      | 7.45622e-1  | 0.04595  | eptadecanoico  |
| 6      | 19.781        |      | 0.0000      | 0.00000     | 0.00000  | eptadecenoico  |
| 7      | 21.051        | MM   | 0.0531      | 30.91878    | 1.90521  | stearico       |
| 8      | 21.500        |      | 0.0000      | 0.00000     | 0.00000  | t-oleico       |
| 9      | 21.686        | MM   | 0.0545      | 68.83620    | 4.24169  | oleico         |
| 10     | 22.183        |      | 0.0000      | 0.00000     | 0.00000  | t-oleico       |
| 11     | 22.838        | MM   | 0.0550      | 68.98318    | 4.25074  | t-linoleico    |
| 12     | 23.059        |      | 0.0000      | 0.00000     | 0.00000  | linoleico      |
| 13     | 23.904        | MM   | 0.0527      | 6.15831e-1  | 0.03795  | t-linolenico   |
| 14     | 24.443        |      | 0.0000      | 0.00000     | 0.00000  | linolenico     |
| 15     | 25.399        | MM   | 0.0651      | 8.09291     | 0.49868  | arachico       |
| 16     | 26.172        | MM   | 0.0673      | 13.86532    | 0.85438  | eicosenoico    |
| 17     | 31.226        |      | 0.0000      | 0.00000     | 0.00000  | behenico       |
| 18     | 31.320        | MM   | 0.1260      | 1329.80469  | 81.94254 | punicico       |
| 19     | 32.119        | MM   | 0.0930      | 42.48827    | 2.61813  | ?              |
| 20     | 32.932        | MM   | 0.1186      | 13.86901    | 0.85461  | ?              |
| 21     | 38.170        | MM   | 0.1191      | 1.14652     | 0.07065  | lignocericico  |

**Figure S20.** GC-FID chromatogram of FAMES in PSO-07 sample.



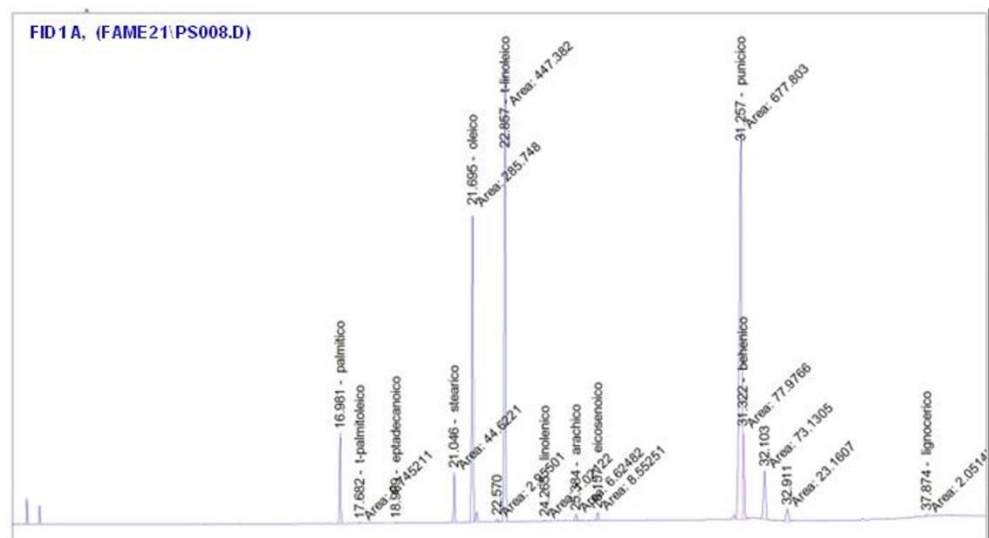

Signal 1: FID1 A,

| Peak # | RetTime [min] | Type | Width [min] | Area [pA*s] | Area %   | Name           |
|--------|---------------|------|-------------|-------------|----------|----------------|
| 1      | 13.454        |      | 0.0000      | 0.00000     | 0.00000  | miristico      |
| 2      | 16.981        | BB   | 0.0474      | 74.52077    | 4.31443  | palmitico      |
| 3      | 17.682        | MM   | 0.0485      | 7.45211e-1  | 0.04314  | t-palmitoleico |
| 4      | 17.931        |      | 0.0000      | 0.00000     | 0.00000  | palmitoleico   |
| 5      | 18.969        | VP   | 0.0501      | 9.53397e-1  | 0.05520  | eptadecanoico  |
| 6      | 19.781        |      | 0.0000      | 0.00000     | 0.00000  | eptadecenoico  |
| 7      | 21.046        | MM   | 0.0535      | 44.62213    | 2.58342  | stearico       |
| 8      | 21.500        |      | 0.0000      | 0.00000     | 0.00000  | t-oleico       |
| 9      | 21.695        | MM   | 0.0556      | 285.74780   | 16.54354 | oleico         |
| 10     | 22.183        |      | 0.0000      | 0.00000     | 0.00000  | t-oleico       |
| 11     | 22.570        | MM   | 0.0576      | 2.95501     | 0.17108  | ?              |
| 12     | 22.857        | MM   | 0.0587      | 447.38214   | 25.90146 | t-linoleico    |
| 13     | 23.059        |      | 0.0000      | 0.00000     | 0.00000  | linoleico      |
| 14     | 24.060        |      | 0.0000      | 0.00000     | 0.00000  | t-linolenico   |
| 15     | 24.265        | MM   | 0.0590      | 1.02122     | 0.05912  | linolenico     |
| 16     | 25.384        | MM   | 0.0627      | 6.62482     | 0.38355  | arachico       |
| 17     | 26.157        | MM   | 0.0641      | 8.55251     | 0.49515  | eicosenoico    |
| 18     | 31.257        | MF   | 0.1063      | 677.80267   | 39.24179 | punicoico      |
| 19     | 31.322        | FM   | 0.0530      | 77.97662    | 4.51450  | behenico       |
| 20     | 32.103        | MM   | 0.0904      | 73.13046    | 4.23393  | ?              |
| 21     | 32.911        | MM   | 0.1113      | 23.16067    | 1.34090  | ?              |
| 22     | 37.874        | MM   | 0.0755      | 2.05147     | 0.11877  | lignocericico  |

**Figure S21.** GC-FID chromatogram of FAMES in PSO-08 sample.

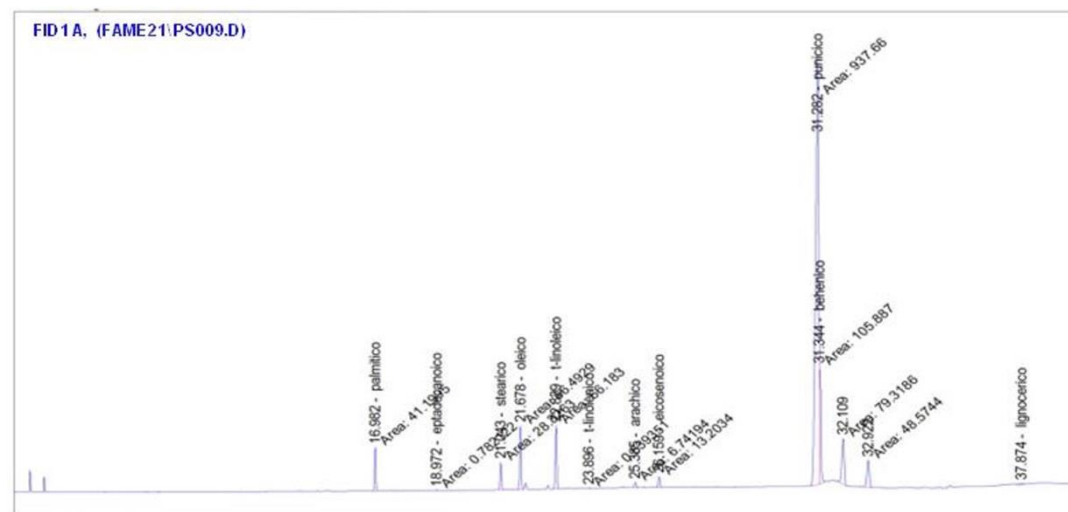

| Peak # | RetTime [min] | Type | Width [min] | Area [pA*s] | Area %   | Name           |
|--------|---------------|------|-------------|-------------|----------|----------------|
| 1      | 13.454        |      | 0.0000      | 0.00000     | 0.00000  | miristico      |
| 2      | 16.982        | MM   | 0.0490      | 41.19951    | 2.94168  | palmitico      |
| 3      | 17.520        |      | 0.0000      | 0.00000     | 0.00000  | t-palmitoleico |
| 4      | 17.931        |      | 0.0000      | 0.00000     | 0.00000  | palmitoleico   |
| 5      | 18.972        | MM   | 0.0515      | 7.82122e-1  | 0.05584  | eptadecanoico  |
| 6      | 19.781        |      | 0.0000      | 0.00000     | 0.00000  | eptadecenoico  |
| 7      | 21.043        | MM   | 0.0531      | 28.32627    | 2.02252  | stearico       |
| 8      | 21.500        |      | 0.0000      | 0.00000     | 0.00000  | t-oleico       |
| 9      | 21.678        | MF   | 0.0546      | 66.49287    | 4.74765  | oleico         |
| 10     | 22.183        |      | 0.0000      | 0.00000     | 0.00000  | t-oleico       |
| 11     | 22.829        | MM   | 0.0548      | 66.18300    | 4.72553  | t-linoleico    |
| 12     | 23.059        |      | 0.0000      | 0.00000     | 0.00000  | linoleico      |
| 13     | 23.896        | MM   | 0.0591      | 6.39351e-1  | 0.04565  | t-linolenico   |
| 14     | 24.443        |      | 0.0000      | 0.00000     | 0.00000  | linolenico     |
| 15     | 25.385        | MM   | 0.0656      | 6.74194     | 0.48138  | arachico       |
| 16     | 26.159        | MM   | 0.0652      | 13.20340    | 0.94274  | eicosenoico    |
| 17     | 31.282        | MF   | 0.1145      | 937.66046   | 66.94984 | punico         |
| 18     | 31.344        | FM   | 0.0474      | 105.88686   | 7.56042  | behenico       |
| 19     | 32.109        | MM   | 0.0904      | 79.31858    | 5.66342  | ?              |
| 20     | 32.922        | MM   | 0.0948      | 48.57444    | 3.46826  | ?              |
| 21     | 37.874        | VV   | 0.1410      | 5.53284     | 0.39505  | lignocerico    |

**Figure S22.** GC-FID chromatogram of FAMEs in PSO-09 sample.



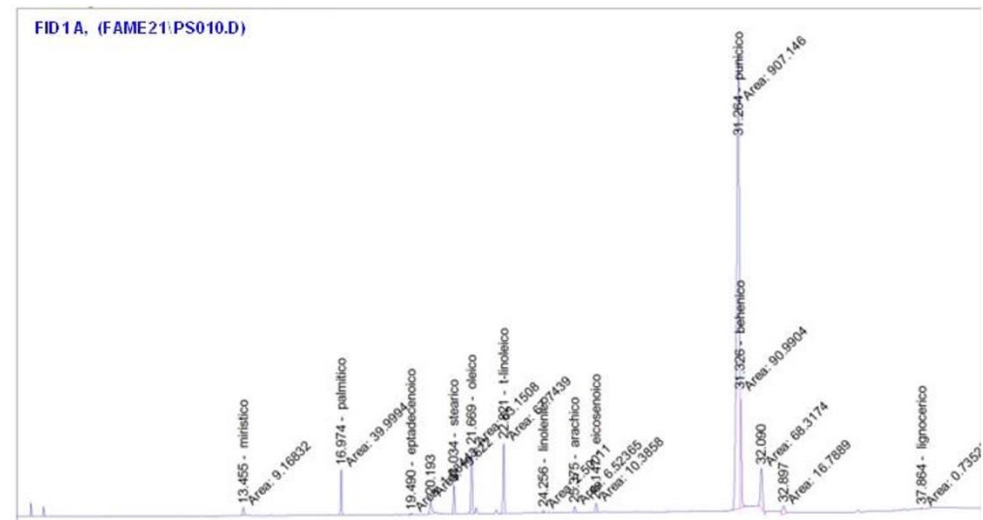

Signal 1: FID1 A,

| Peak # | RetTime [min] | Type | Width [min] | Area [pA*s] | Area %   | Name           |
|--------|---------------|------|-------------|-------------|----------|----------------|
| 1      | 13.455        | MM   | 0.0643      | 9.16832     | 0.68844  | miristico      |
| 2      | 16.974        | MM   | 0.0490      | 39.99938    | 3.00352  | palmitico      |
| 3      | 17.520        |      | 0.0000      | 0.00000     | 0.00000  | t-palmitoleico |
| 4      | 17.931        |      | 0.0000      | 0.00000     | 0.00000  | palmitoleico   |
| 5      | 19.107        |      | 0.0000      | 0.00000     | 0.00000  | eptadecanoico  |
| 6      | 19.490        | MM   | 0.0852      | 1.58443     | 0.11897  | eptadecenoico  |
| 7      | 20.193        | MM   | 0.0732      | 19.62197    | 1.47340  | ?              |
| 8      | 21.034        | PV   | 0.0497      | 27.09271    | 2.03437  | stearico       |
| 9      | 21.500        |      | 0.0000      | 0.00000     | 0.00000  | t-oleico       |
| 10     | 21.669        | FM   | 0.0548      | 63.15081    | 4.74194  | oleico         |
| 11     | 22.183        |      | 0.0000      | 0.00000     | 0.00000  | t-oleico       |
| 12     | 22.821        | MM   | 0.0546      | 67.74392    | 5.08684  | t-linoleico    |
| 13     | 23.059        |      | 0.0000      | 0.00000     | 0.00000  | linoleico      |
| 14     | 24.060        |      | 0.0000      | 0.00000     | 0.00000  | t-linolenico   |
| 15     | 24.256        | MM   | 0.0649      | 2.50011     | 0.18773  | linolenico     |
| 16     | 25.375        | MM   | 0.0635      | 6.52365     | 0.48986  | arachico       |
| 17     | 26.147        | MM   | 0.0655      | 10.38582    | 0.77986  | eicosenoico    |
| 18     | 31.264        | MF   | 0.1138      | 907.14606   | 68.11688 | punico         |
| 19     | 31.326        | FM   | 0.0451      | 90.99041    | 6.83240  | behenico       |
| 20     | 32.090        | MM   | 0.0945      | 68.31741    | 5.12990  | ?              |
| 21     | 32.897        | MM   | 0.1204      | 16.78894    | 1.26067  | ?              |
| 22     | 37.864        | MM   | 0.0771      | 7.35270e-1  | 0.05521  | lignocericico  |

**Figure S23.** GC-FID chromatogram of FAMES in PSO-10 sample.

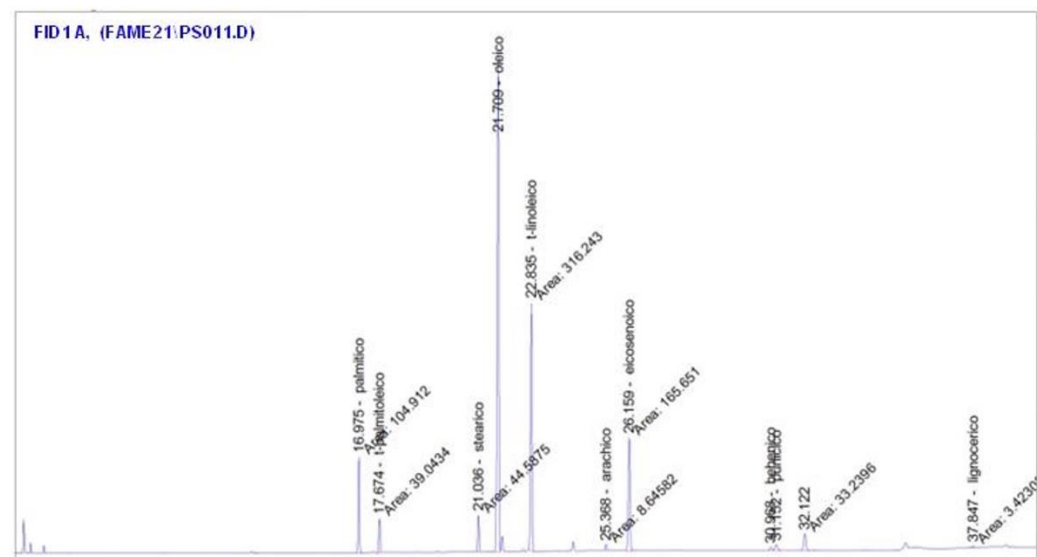

| Peak # | RetTime [min] | Type | Width [min] | Area [pA*s] | Area %   | Name           |
|--------|---------------|------|-------------|-------------|----------|----------------|
| 1      | 13.454        |      | 0.0000      | 0.00000     | 0.00000  | miristico      |
| 2      | 16.975        | MM   | 0.0495      | 104.91170   | 7.34178  | palmitico      |
| 3      | 17.674        | MM   | 0.0510      | 39.04345    | 2.73228  | t-palmitoleico |
| 4      | 17.931        |      | 0.0000      | 0.00000     | 0.00000  | palmitoleico   |
| 5      | 19.107        |      | 0.0000      | 0.00000     | 0.00000  | eptadecanoico  |
| 6      | 19.781        |      | 0.0000      | 0.00000     | 0.00000  | eptadecenoico  |
| 7      | 21.036        | MM   | 0.0546      | 44.58746    | 3.12025  | stearico       |
| 8      | 21.500        |      | 0.0000      | 0.00000     | 0.00000  | t-oleico       |
| 9      | 21.709        | VV   | 0.0600      | 693.92670   | 48.56135 | oleico         |
| 10     | 22.183        |      | 0.0000      | 0.00000     | 0.00000  | t-oleico       |
| 11     | 22.835        | MM   | 0.0577      | 316.24344   | 22.13088 | t-linoleico    |
| 12     | 23.059        |      | 0.0000      | 0.00000     | 0.00000  | linoleico      |
| 13     | 24.060        |      | 0.0000      | 0.00000     | 0.00000  | t-linolenico   |
| 14     | 24.443        |      | 0.0000      | 0.00000     | 0.00000  | linolenico     |
| 15     | 25.368        | MM   | 0.0620      | 8.64582     | 0.60504  | arachico       |
| 16     | 26.159        | MM   | 0.0664      | 165.65128   | 11.59236 | eicosenoico    |
| 17     | 30.968        | BV   | 0.0810      | 6.41822     | 0.44915  | behenico       |
| 18     | 31.152        | VB   | 0.0888      | 12.87826    | 0.90123  | punicico       |
| 19     | 32.122        | MM   | 0.0903      | 33.23963    | 2.32613  | ?              |
| 20     | 37.847        | MM   | 0.0893      | 3.42306     | 0.23955  | lignocericico  |

**Figure S24.** GC-FID chromatogram of FAMES in PSO-11 sample.

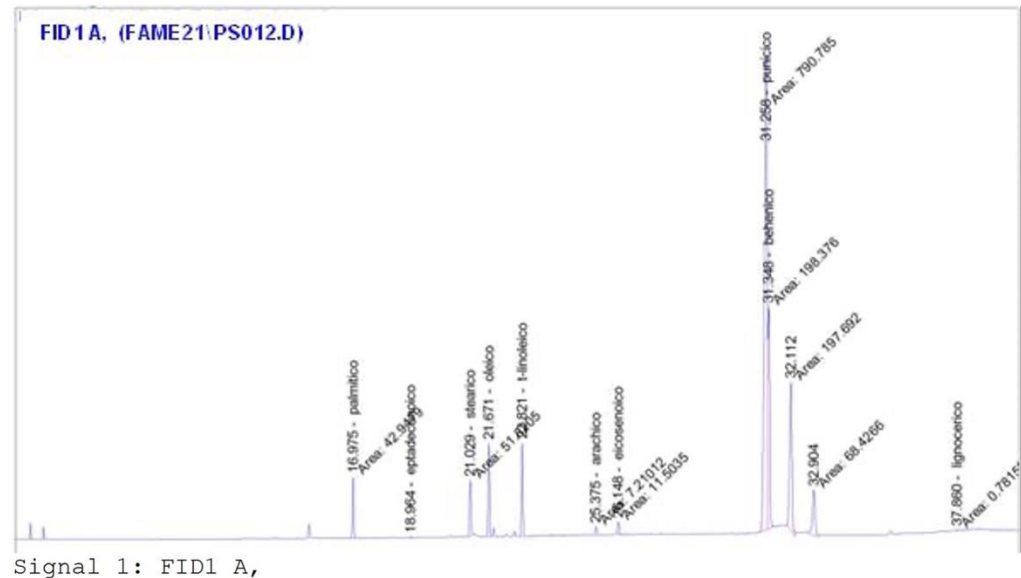

| Peak # | RetTime [min] | Type | Width [min] | Area [pA*s] | Area %   | Name           |
|--------|---------------|------|-------------|-------------|----------|----------------|
| 1      | 13.454        |      | 0.0000      | 0.00000     | 0.00000  | miristico      |
| 2      | 16.975        | MM   | 0.0490      | 42.94794    | 2.83792  | palmitico      |
| 3      | 17.520        |      | 0.0000      | 0.00000     | 0.00000  | t-palmitoleico |
| 4      | 17.931        |      | 0.0000      | 0.00000     | 0.00000  | palmitoleico   |
| 5      | 18.964        | PV   | 0.0514      | 8.55024e-1  | 0.05650  | eptadecanoico  |
| 6      | 19.781        |      | 0.0000      | 0.00000     | 0.00000  | eptadecenoico  |
| 7      | 21.029        | MM   | 0.0657      | 51.82048    | 3.42420  | stearico       |
| 8      | 21.500        |      | 0.0000      | 0.00000     | 0.00000  | t-oleico       |
| 9      | 21.671        | VV   | 0.0502      | 71.27010    | 4.70939  | oleico         |
| 10     | 22.183        |      | 0.0000      | 0.00000     | 0.00000  | t-oleico       |
| 11     | 22.821        | BP   | 0.0503      | 71.69385    | 4.73739  | t-linoleico    |
| 12     | 23.059        |      | 0.0000      | 0.00000     | 0.00000  | linoleico      |
| 13     | 24.060        |      | 0.0000      | 0.00000     | 0.00000  | t-linolenico   |
| 14     | 24.443        |      | 0.0000      | 0.00000     | 0.00000  | linolenico     |
| 15     | 25.375        | MM   | 0.0633      | 7.21012     | 0.47643  | arachico       |
| 16     | 26.148        | MM   | 0.0638      | 11.50354    | 0.76013  | eicosenoico    |
| 17     | 31.258        | MF   | 0.1176      | 790.78522   | 52.25353 | punico         |
| 18     | 31.348        | FM   | 0.0632      | 198.37614   | 13.10831 | behenico       |
| 19     | 32.112        | MM   | 0.0938      | 197.69160   | 13.06307 | ?              |
| 20     | 32.904        | MM   | 0.1066      | 68.42661    | 4.52150  | ?              |
| 21     | 37.860        | MM   | 0.0743      | 7.81527e-1  | 0.05164  | lignocericico  |

**Figure S25.** GC-FID chromatogram of FAMEs in PSO-12 sample.

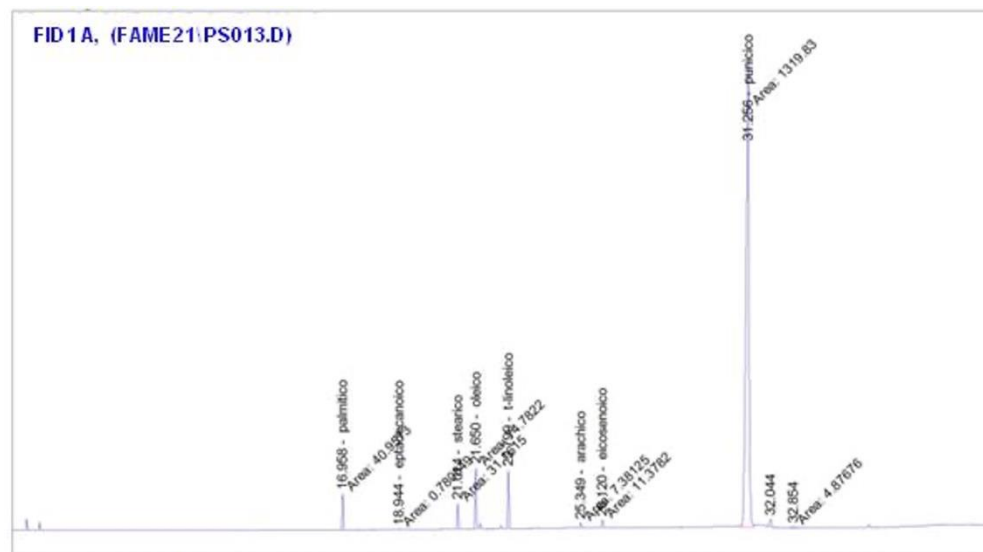

Signal 1: FID1 A,

| Peak # | RetTime [min] | Type | Width [min] | Area [pA*s] | Area %   | Name           |
|--------|---------------|------|-------------|-------------|----------|----------------|
| 1      | 13.454        |      | 0.0000      | 0.00000     | 0.00000  | miristico      |
| 2      | 16.958        | MM   | 0.0491      | 40.95733    | 2.59109  | palmitico      |
| 3      | 17.520        |      | 0.0000      | 0.00000     | 0.00000  | t-palmitoleico |
| 4      | 17.931        |      | 0.0000      | 0.00000     | 0.00000  | palmitoleico   |
| 5      | 18.944        | MM   | 0.0496      | 7.80849e-1  | 0.04940  | eptadecanoico  |
| 6      | 19.781        |      | 0.0000      | 0.00000     | 0.00000  | eptadecenoico  |
| 7      | 21.014        | MM   | 0.0524      | 31.16150    | 1.97137  | stearico       |
| 8      | 21.500        |      | 0.0000      | 0.00000     | 0.00000  | t-oleico       |
| 9      | 21.650        | MM   | 0.0534      | 74.78225    | 4.73096  | oleico         |
| 10     | 22.183        |      | 0.0000      | 0.00000     | 0.00000  | t-oleico       |
| 11     | 22.799        | VB   | 0.0514      | 74.11263    | 4.68860  | t-linoleico    |
| 12     | 23.059        |      | 0.0000      | 0.00000     | 0.00000  | linoleico      |
| 13     | 24.060        |      | 0.0000      | 0.00000     | 0.00000  | t-linolenico   |
| 14     | 24.443        |      | 0.0000      | 0.00000     | 0.00000  | linolenico     |
| 15     | 25.349        | MM   | 0.0631      | 7.38125     | 0.46696  | arachico       |
| 16     | 26.120        | MM   | 0.0637      | 11.37820    | 0.71982  | eicosenoico    |
| 17     | 31.256        | MM   | 0.1229      | 1319.82825  | 83.49647 | punicico       |
| 18     | 31.334        |      | 0.0000      | 0.00000     | 0.00000  | behenico       |
| 19     | 32.044        | BP   | 0.0844      | 15.44037    | 0.97681  | ?              |
| 20     | 32.854        | MM   | 0.1259      | 4.87676     | 0.30852  | ?              |
| 21     | 38.096        |      | 0.0000      | 0.00000     | 0.00000  | lignocericico  |

**Figure S26.** GC-FID chromatogram of FAMES in PSO-13 sample.

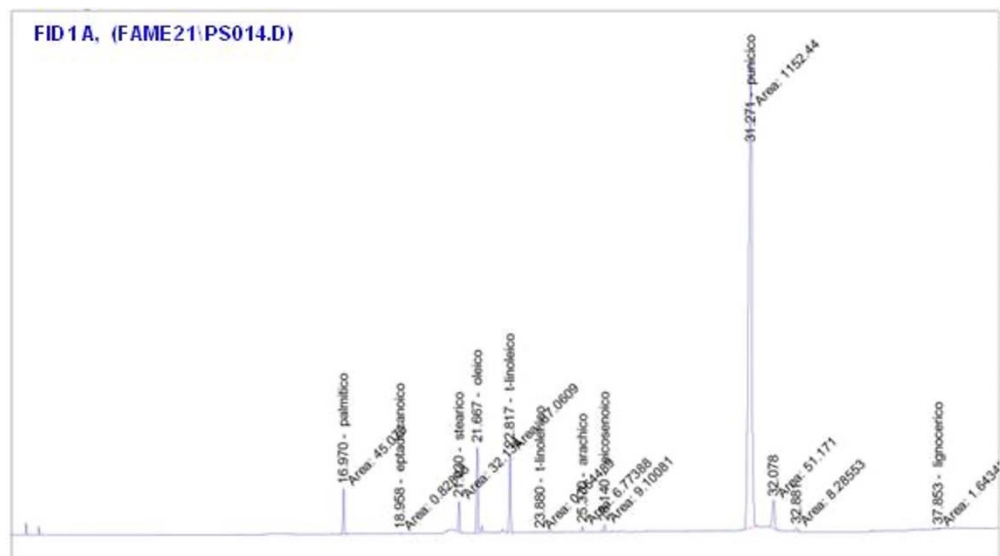

| Peak # | RetTime [min] | Type | Width [min] | Area [pA*s] | Area %   | Name           |
|--------|---------------|------|-------------|-------------|----------|----------------|
| 1      | 13.454        |      | 0.0000      | 0.00000     | 0.00000  | miristico      |
| 2      | 16.970        | MM   | 0.0492      | 45.07296    | 3.02970  | palmitico      |
| 3      | 17.520        |      | 0.0000      | 0.00000     | 0.00000  | t-palmitoleico |
| 4      | 17.931        |      | 0.0000      | 0.00000     | 0.00000  | palmitoleico   |
| 5      | 18.958        | MM   | 0.0497      | 8.28480e-1  | 0.05569  | eptadecanoico  |
| 6      | 19.781        |      | 0.0000      | 0.00000     | 0.00000  | eptadecenoico  |
| 7      | 21.030        | MM   | 0.0527      | 32.13400    | 2.15997  | stearico       |
| 8      | 21.500        |      | 0.0000      | 0.00000     | 0.00000  | t-oleico       |
| 9      | 21.667        | VV   | 0.0504      | 92.62521    | 6.22605  | oleico         |
| 10     | 22.183        |      | 0.0000      | 0.00000     | 0.00000  | t-oleico       |
| 11     | 22.817        | MM   | 0.0548      | 87.06090    | 5.85203  | t-linoleico    |
| 12     | 23.059        |      | 0.0000      | 0.00000     | 0.00000  | linoleico      |
| 13     | 23.880        | MM   | 0.0579      | 5.64489e-1  | 0.03794  | t-linolenico   |
| 14     | 24.443        |      | 0.0000      | 0.00000     | 0.00000  | linolenico     |
| 15     | 25.370        | MM   | 0.0644      | 6.77388     | 0.45532  | arachico       |
| 16     | 26.140        | MM   | 0.0651      | 9.10081     | 0.61174  | eicosenoico    |
| 17     | 31.271        | MM   | 0.1249      | 1152.44238  | 77.46454 | punicico       |
| 18     | 31.334        |      | 0.0000      | 0.00000     | 0.00000  | behenico       |
| 19     | 32.078        | MM   | 0.0911      | 51.17101    | 3.43960  | ?              |
| 20     | 32.881        | MM   | 0.1064      | 8.28553     | 0.55693  | ?              |
| 21     | 37.853        | MM   | 0.1076      | 1.64342     | 0.11047  | lignocerico    |

Figure S27. GC-FID chromatogram of FAMES in PSO-14 sample.



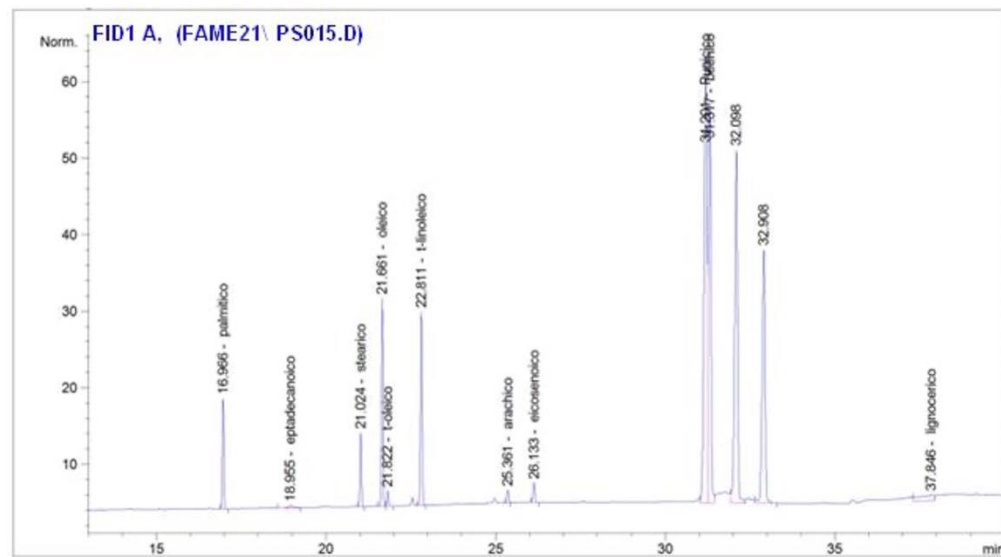

Signal 1: FID1 A,

| Peak # | RetTime [min] | Type | Width [min] | Area [pA*s] | Area %   | Name           |
|--------|---------------|------|-------------|-------------|----------|----------------|
| 1      | 13.454        |      | 0.0000      | 0.00000     | 0.00000  | miristico      |
| 2      | 16.966        | VB   | 0.0445      | 42.90868    | 3.08902  | palmitico      |
| 3      | 17.520        |      | 0.0000      | 0.00000     | 0.00000  | t-palmitoleico |
| 4      | 17.931        |      | 0.0000      | 0.00000     | 0.00000  | palmitoleico   |
| 5      | 18.955        | VV   | 0.1136      | 3.20228     | 0.23053  | eptadecanoico  |
| 6      | 19.781        |      | 0.0000      | 0.00000     | 0.00000  | eptadecenoico  |
| 7      | 21.024        | BV   | 0.0524      | 31.08861    | 2.23808  | stearico       |
| 8      | 21.661        | VV   | 0.0507      | 88.85754    | 6.39690  | oleico         |
| 9      | 21.822        | VB   | 0.0522      | 6.73577     | 0.48491  | t-oleico       |
| 10     | 22.183        |      | 0.0000      | 0.00000     | 0.00000  | t-oleico       |
| 11     | 22.811        | BP   | 0.0517      | 84.95146    | 6.11570  | t-linoleico    |
| 12     | 23.059        |      | 0.0000      | 0.00000     | 0.00000  | linoleico      |
| 13     | 24.060        |      | 0.0000      | 0.00000     | 0.00000  | t-linolenico   |
| 14     | 24.443        |      | 0.0000      | 0.00000     | 0.00000  | linolenico     |
| 15     | 25.361        | VV   | 0.0591      | 6.39131     | 0.46011  | arachico       |
| 16     | 26.133        | VB   | 0.0620      | 10.34838    | 0.74498  | eicosenoico    |
| 17     | 31.201        | VV   | 0.0923      | 362.69617   | 26.11068 | Punicoico      |
| 18     | 31.317        | VV   | 0.0764      | 264.68753   | 19.05499 | beenico        |
| 19     | 32.098        | VV   | 0.0848      | 266.34842   | 19.17456 | ?              |
| 20     | 32.908        | VB   | 0.0898      | 198.36162   | 14.28015 | ?              |
| 21     | 37.846        | VV   | 0.3545      | 22.49436    | 1.61938  | lignocericico  |

**Figure S28.** GC-FID chromatogram of FAMES in PSO-15 sample.

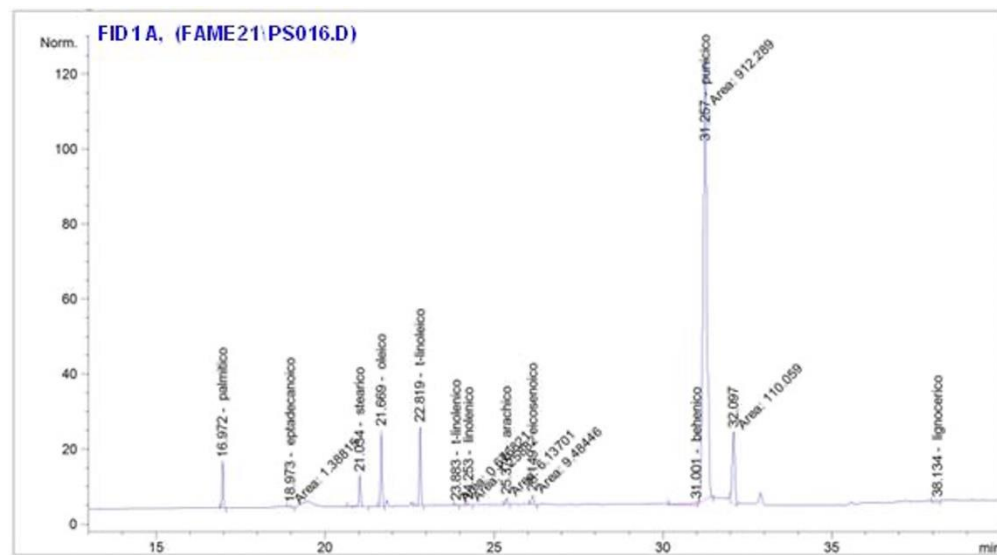

Signal 1: FID1 A,

| Peak # | RetTime [min] | Type | Width [min] | Area [pA*s] | Area %   | Name           |
|--------|---------------|------|-------------|-------------|----------|----------------|
| 1      | 13.454        |      | 0.0000      | 0.00000     | 0.00000  | miristico      |
| 2      | 16.972        | BB   | 0.0465      | 36.32817    | 2.84449  | palmitico      |
| 3      | 17.520        |      | 0.0000      | 0.00000     | 0.00000  | t-palmitoleico |
| 4      | 17.931        |      | 0.0000      | 0.00000     | 0.00000  | palmitoleico   |
| 5      | 18.973        | MM   | 0.0776      | 1.38815     | 0.10869  | eptadecanoico  |
| 6      | 19.781        |      | 0.0000      | 0.00000     | 0.00000  | eptadecenoico  |
| 7      | 21.034        | VB   | 0.0551      | 30.39026    | 2.37955  | stearico       |
| 8      | 21.500        |      | 0.0000      | 0.00000     | 0.00000  | t-oleico       |
| 9      | 21.669        | VV   | 0.0532      | 66.96437    | 5.24329  | oleico         |
| 10     | 22.183        |      | 0.0000      | 0.00000     | 0.00000  | t-oleico       |
| 11     | 22.819        | VB   | 0.0537      | 70.51120    | 5.52101  | t-linoleico    |
| 12     | 23.059        |      | 0.0000      | 0.00000     | 0.00000  | linoleico      |
| 13     | 23.883        | MM   | 0.0659      | 6.76821e-1  | 0.05299  | t-linolenico   |
| 14     | 24.253        | MM   | 0.0611      | 1.25882     | 0.09857  | linolenico     |
| 15     | 25.378        | MM   | 0.0613      | 6.13701     | 0.48053  | arachico       |
| 16     | 26.149        | MM   | 0.0654      | 9.48446     | 0.74263  | eicosenoico    |
| 17     | 31.001        | VV   | 0.3877      | 24.97685    | 1.95568  | behenico       |
| 18     | 31.257        | MM   | 0.1284      | 912.28931   | 71.43199 | punicico       |
| 19     | 32.097        | MM   | 0.0948      | 110.05910   | 8.61760  | ?              |
| 20     | 38.134        | VV   | 0.1592      | 6.67934     | 0.52299  | lignocerico    |

**Figure S29.** GC-FID chromatogram of FAMES in PSO-16 sample.

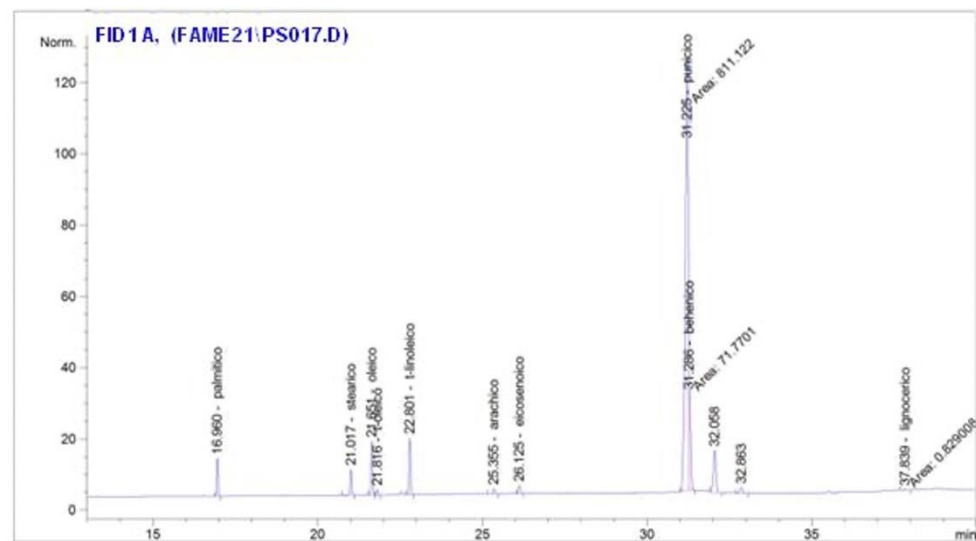

Signal 1: FID1 A,

| Peak # | RetTime [min] | Type | Width [min] | Area [pA*s] | Area %   | Name           |
|--------|---------------|------|-------------|-------------|----------|----------------|
| 1      | 13.454        |      | 0.0000      | 0.00000     | 0.00000  | miristico      |
| 2      | 16.960        | VB   | 0.0440      | 31.35129    | 2.75237  | palmitico      |
| 3      | 17.520        |      | 0.0000      | 0.00000     | 0.00000  | t-palmitoleico |
| 4      | 17.931        |      | 0.0000      | 0.00000     | 0.00000  | palmitoleico   |
| 5      | 19.107        |      | 0.0000      | 0.00000     | 0.00000  | eptadecanoico  |
| 6      | 19.781        |      | 0.0000      | 0.00000     | 0.00000  | eptadecenoico  |
| 7      | 21.017        | BV   | 0.0502      | 23.42564    | 2.05657  | stearico       |
| 8      | 21.651        | VV   | 0.0508      | 49.72750    | 4.36564  | oleico         |
| 9      | 21.816        | VP   | 0.0509      | 5.17202     | 0.45406  | t-oleico       |
| 10     | 22.183        |      | 0.0000      | 0.00000     | 0.00000  | t-oleico       |
| 11     | 22.801        | PB   | 0.0536      | 52.59961    | 4.61779  | t-linoleico    |
| 12     | 23.059        |      | 0.0000      | 0.00000     | 0.00000  | linoleico      |
| 13     | 24.060        |      | 0.0000      | 0.00000     | 0.00000  | t-linolenico   |
| 14     | 24.443        |      | 0.0000      | 0.00000     | 0.00000  | linolenico     |
| 15     | 25.355        | BV   | 0.0615      | 5.85374     | 0.51391  | arachico       |
| 16     | 26.125        | VV   | 0.0627      | 9.35360     | 0.82117  | eicosenoico    |
| 17     | 31.225        | MF   | 0.1108      | 811.12158   | 71.20946 | punico         |
| 18     | 31.286        | FM   | 0.0439      | 71.77013    | 6.30080  | behenico       |
| 19     | 32.058        | VP   | 0.0894      | 68.72954    | 6.03386  | ?              |
| 20     | 32.863        | BP   | 0.0894      | 9.13068     | 0.80159  | ?              |
| 21     | 37.839        | MM   | 0.1033      | 8.29008e-1  | 0.07278  | lignocero      |

**Figure S30.** GC-FID chromatogram of FAMES in PSO-17 sample.



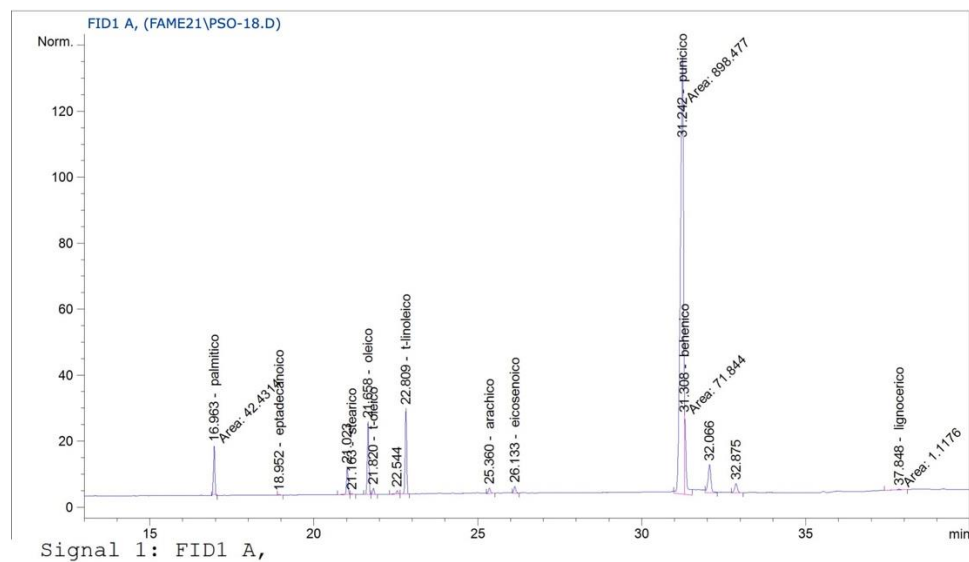

Signal 1: FID1 A,

| Peak # | RetTime [min] | Type | Width [min] | Area [pA*s] | Area %   | Name           |
|--------|---------------|------|-------------|-------------|----------|----------------|
| 1      | 13.454        |      | 0.0000      | 0.00000     | 0.00000  | miristico      |
| 2      | 16.962        | MM   | 0.0506      | 52.75804    | 3.39672  | palmitico      |
| 3      | 17.520        |      | 0.0000      | 0.00000     | 0.00000  | t-palmitoleico |
| 4      | 17.931        |      | 0.0000      | 0.00000     | 0.00000  | palmitoleico   |
| 5      | 18.948        | MM   | 0.0496      | 8.27988e-1  | 0.05331  | eptadecanoico  |
| 6      | 19.781        |      | 0.0000      | 0.00000     | 0.00000  | eptadecenoico  |
| 7      | 21.019        | VV   | 0.0501      | 31.52416    | 2.02962  | ?              |
| 8      | 21.158        | VP   | 0.0546      | 1.13248     | 0.07291  | stearico       |
| 9      | 21.655        | VV   | 0.0504      | 82.28481    | 5.29775  | oleico         |
| 10     | 21.817        | VB   | 0.0527      | 6.97757     | 0.44924  | t-oleico       |
| 11     | 22.183        |      | 0.0000      | 0.00000     | 0.00000  | t-oleico       |
| 12     | 22.540        | VP   | 0.0517      | 3.99488     | 0.25720  | ?              |
| 13     | 22.807        | BB   | 0.0542      | 97.47330    | 6.27563  | t-linoleico    |
| 14     | 23.059        |      | 0.0000      | 0.00000     | 0.00000  | linoleico      |
| 15     | 24.060        |      | 0.0000      | 0.00000     | 0.00000  | t-linolenico   |
| 16     | 24.443        |      | 0.0000      | 0.00000     | 0.00000  | linolenico     |
| 17     | 25.357        | VB   | 0.0619      | 7.97196     | 0.51326  | arachico       |
| 18     | 26.128        | VB   | 0.0656      | 10.24386    | 0.65953  | eicosenoico    |
| 19     | 30.970        | VV   | 0.1149      | 5.75914     | 0.37079  | behenico       |
| 20     | 31.251        | VV   | 0.1097      | 1163.92432  | 74.93698 | punico         |
| 21     | 32.060        | VV   | 0.0911      | 61.09984    | 3.93379  | ?              |
| 22     | 32.870        | BP   | 0.0855      | 18.71712    | 1.20506  | ?              |
| 23     | 38.127        | VV   | 0.1737      | 8.51467     | 0.54820  | lignoceroico   |

**Figure S31.** GC-FID chromatogram of FAMES in PSO-18 sample.

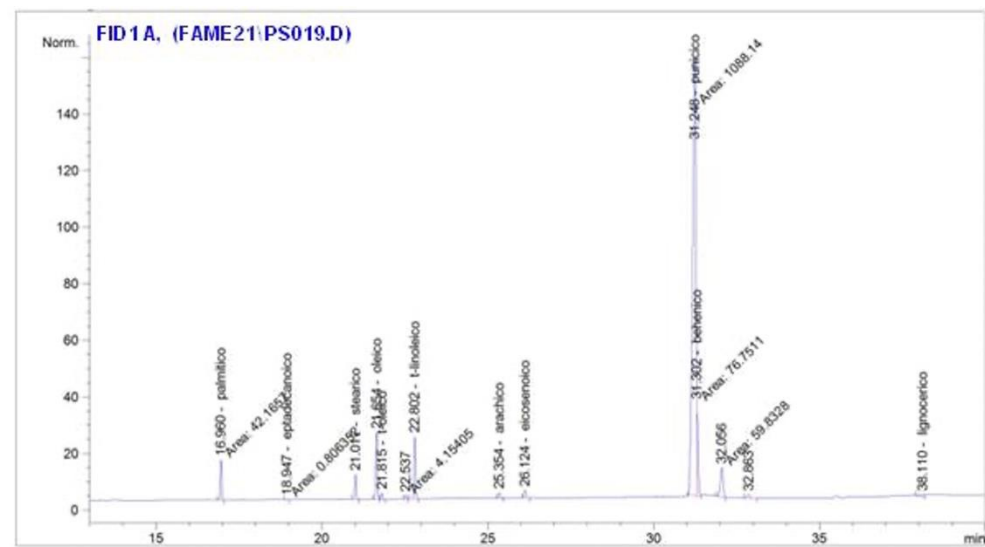

Signal 1: FID1 A,

| Peak # | RetTime [min] | Type | Width [min] | Area [pA*s] | Area %   | Name           |
|--------|---------------|------|-------------|-------------|----------|----------------|
| 1      | 13.454        |      | 0.0000      | 0.00000     | 0.00000  | miristico      |
| 2      | 16.960        | MM   | 0.0487      | 42.16571    | 2.82820  | palmitico      |
| 3      | 17.520        |      | 0.0000      | 0.00000     | 0.00000  | t-palmitoleico |
| 4      | 17.931        |      | 0.0000      | 0.00000     | 0.00000  | palmitoleico   |
| 5      | 18.947        | MM   | 0.0514      | 8.06352e-1  | 0.05408  | eptadecanoico  |
| 6      | 19.781        |      | 0.0000      | 0.00000     | 0.00000  | eptadecenoico  |
| 7      | 21.017        | VV   | 0.0502      | 28.65899    | 1.92226  | stearico       |
| 8      | 21.654        | VV   | 0.0508      | 77.37626    | 5.18989  | oleico         |
| 9      | 21.815        | VP   | 0.0506      | 6.99174     | 0.46896  | t-oleico       |
| 10     | 22.183        |      | 0.0000      | 0.00000     | 0.00000  | t-oleico       |
| 11     | 22.537        | MM   | 0.0579      | 4.15405     | 0.27863  | ?              |
| 12     | 22.802        | VB   | 0.0507      | 72.06013    | 4.83332  | t-linoleico    |
| 13     | 23.059        |      | 0.0000      | 0.00000     | 0.00000  | linoleico      |
| 14     | 24.060        |      | 0.0000      | 0.00000     | 0.00000  | t-linolenico   |
| 15     | 24.443        |      | 0.0000      | 0.00000     | 0.00000  | linolenico     |
| 16     | 25.354        | VV   | 0.0627      | 7.83386     | 0.52544  | arachico       |
| 17     | 26.124        | VB   | 0.0662      | 11.82820    | 0.79336  | eicosenoico    |
| 18     | 31.248        | MF   | 0.1163      | 1088.14099  | 72.98530 | punicico       |
| 19     | 31.302        | FM   | 0.0388      | 76.75108    | 5.14795  | behenico       |
| 20     | 32.056        | MM   | 0.0942      | 59.83276    | 4.01319  | ?              |
| 21     | 32.863        | VB   | 0.0956      | 7.64760     | 0.51295  | ?              |
| 22     | 38.110        | VV   | 0.1792      | 6.65658     | 0.44648  | lignocerico    |

**Figure S32.** GC-FID chromatogram of FAMES in PSO-19 sample.

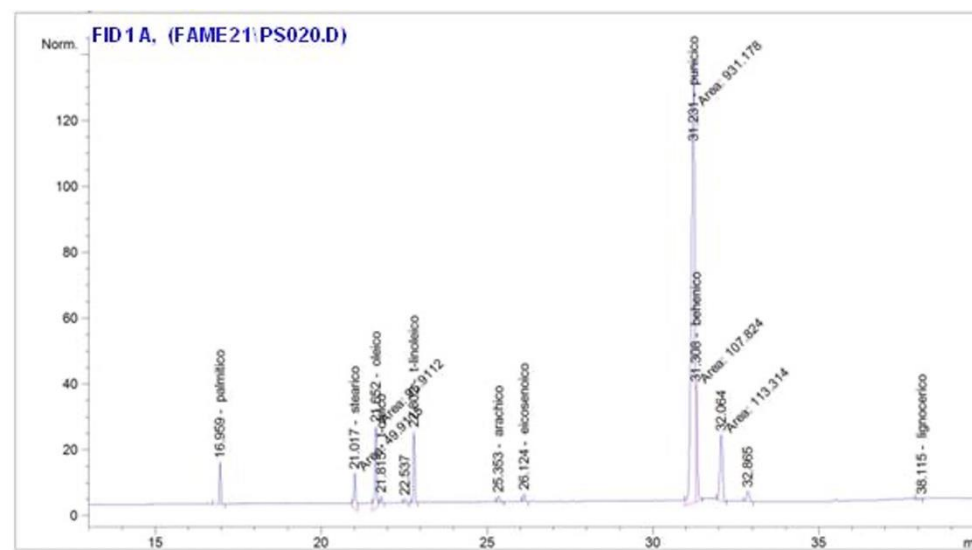

Signal 1: FID1 A,

| Peak # | RetTime [min] | Type | Width [min] | Area [pA*s] | Area %   | Name           |
|--------|---------------|------|-------------|-------------|----------|----------------|
| 1      | 13.454        |      | 0.0000      | 0.00000     | 0.00000  | miristico      |
| 2      | 16.959        | VP   | 0.0474      | 38.16679    | 2.61582  | palmitico      |
| 3      | 17.520        |      | 0.0000      | 0.00000     | 0.00000  | t-palmitoleico |
| 4      | 17.931        |      | 0.0000      | 0.00000     | 0.00000  | palmitoleico   |
| 5      | 19.107        |      | 0.0000      | 0.00000     | 0.00000  | eptadecanoico  |
| 6      | 19.781        |      | 0.0000      | 0.00000     | 0.00000  | eptadecenoico  |
| 7      | 21.017        | MM   | 0.0757      | 49.91147    | 3.42076  | stearico       |
| 8      | 21.652        | MM   | 0.0638      | 95.91119    | 6.57342  | oleico         |
| 9      | 21.815        | VP   | 0.0501      | 6.12510     | 0.41979  | t-oleico       |
| 10     | 22.183        |      | 0.0000      | 0.00000     | 0.00000  | t-oleico       |
| 11     | 22.537        | PP   | 0.0536      | 3.77839     | 0.25896  | ?              |
| 12     | 22.802        | BB   | 0.0510      | 71.64050    | 4.90999  | t-linoleico    |
| 13     | 23.059        |      | 0.0000      | 0.00000     | 0.00000  | linoleico      |
| 14     | 24.060        |      | 0.0000      | 0.00000     | 0.00000  | t-linolenico   |
| 15     | 24.443        |      | 0.0000      | 0.00000     | 0.00000  | linolenico     |
| 16     | 25.353        | VV   | 0.0649      | 7.45058     | 0.51064  | arachico       |
| 17     | 26.124        | VB   | 0.0657      | 9.74406     | 0.66782  | eicosenoico    |
| 18     | 31.231        | MF   | 0.1146      | 931.17841   | 63.81969 | punico         |
| 19     | 31.308        | FM   | 0.0509      | 107.82378   | 7.38986  | behenico       |
| 20     | 32.064        | MM   | 0.0942      | 113.31428   | 7.76616  | ?              |
| 21     | 32.865        | BB   | 0.0883      | 17.87079    | 1.22480  | ?              |
| 22     | 38.115        | VV   | 0.1599      | 6.16163     | 0.42230  | lignocericico  |

Figure S33. GC-FID chromatogram of FAMES in PSO-20 sample.

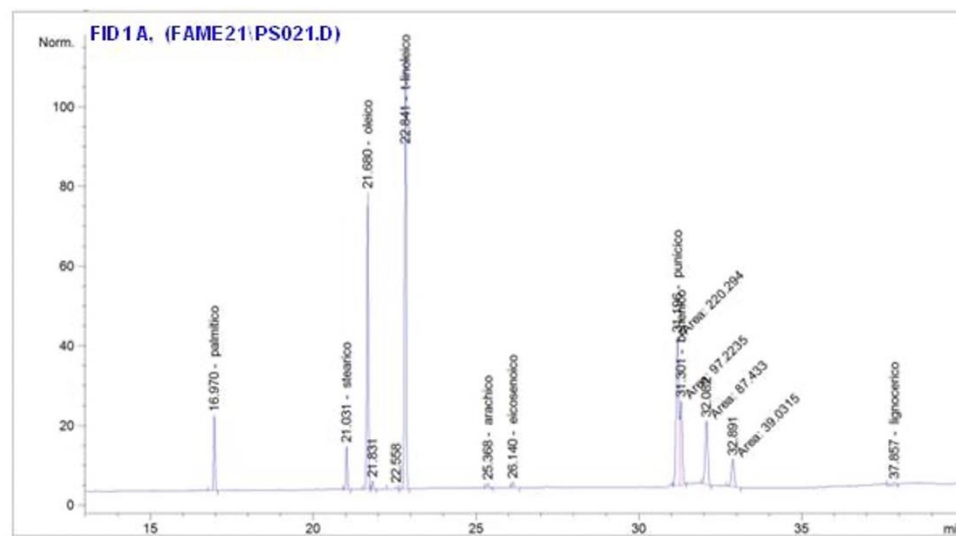

Signal 1: FID1 A,

| Peak # | RetTime [min] | Type | Width [min] | Area [pA*s] | Area %   | Name           |
|--------|---------------|------|-------------|-------------|----------|----------------|
| 1      | 13.454        |      | 0.0000      | 0.00000     | 0.00000  | miristico      |
| 2      | 16.970        | PB   | 0.0469      | 55.86669    | 4.65884  | palmitico      |
| 3      | 17.520        |      | 0.0000      | 0.00000     | 0.00000  | t-palmitoleico |
| 4      | 17.931        |      | 0.0000      | 0.00000     | 0.00000  | palmitoleico   |
| 5      | 19.107        |      | 0.0000      | 0.00000     | 0.00000  | eptadecanoico  |
| 6      | 19.781        |      | 0.0000      | 0.00000     | 0.00000  | eptadecenoico  |
| 7      | 21.031        | VB   | 0.0501      | 34.94046    | 2.91376  | stearico       |
| 8      | 21.500        |      | 0.0000      | 0.00000     | 0.00000  | t-oleico       |
| 9      | 21.680        | VV   | 0.0513      | 248.26915   | 20.70366 | oleico         |
| 10     | 21.831        | VV   | 0.0499      | 6.65815     | 0.55524  | ?              |
| 11     | 22.183        |      | 0.0000      | 0.00000     | 0.00000  | t-oleico       |
| 12     | 22.558        | VP   | 0.0568      | 2.00021     | 0.16680  | ?              |
| 13     | 22.841        | VB   | 0.0559      | 384.40778   | 32.05654 | t-linoleico    |
| 14     | 23.059        |      | 0.0000      | 0.00000     | 0.00000  | linoleico      |
| 15     | 24.060        |      | 0.0000      | 0.00000     | 0.00000  | t-linolenico   |
| 16     | 24.443        |      | 0.0000      | 0.00000     | 0.00000  | linolenico     |
| 17     | 25.368        | VB   | 0.0694      | 5.32512     | 0.44407  | arachico       |
| 18     | 26.140        | VB   | 0.0635      | 6.09487     | 0.50826  | eicosenoico    |
| 19     | 31.196        | MF   | 0.0978      | 220.29388   | 18.37075 | punico         |
| 20     | 31.301        | FM   | 0.0765      | 97.22355    | 8.10767  | behenico       |
| 21     | 32.082        | MM   | 0.0909      | 87.43296    | 7.29121  | ?              |
| 22     | 32.891        | MM   | 0.0935      | 39.03148    | 3.25491  | ?              |
| 23     | 37.857        | VV   | 0.1809      | 11.61140    | 0.96830  | lignoceroico   |

**Figure S34.** GC-FID chromatogram of FAMES in PSO-21 sample.

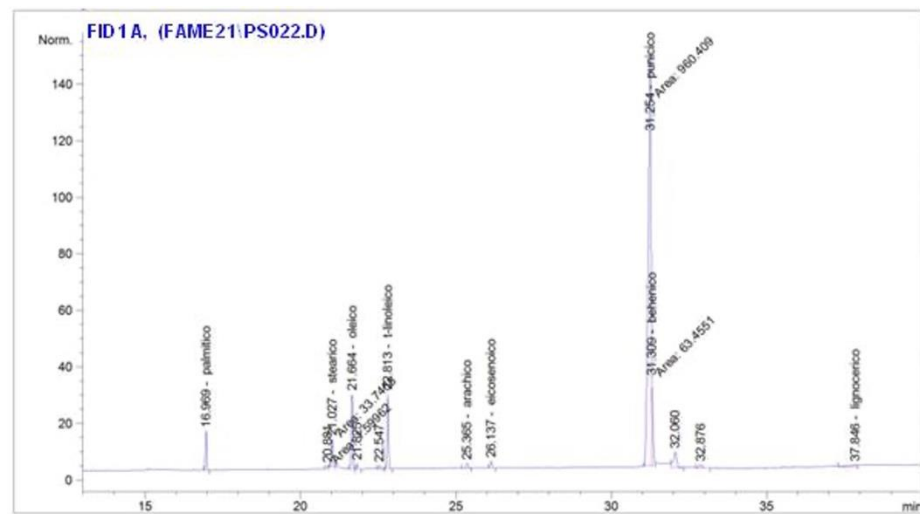

Signal 1: FID1 A,

| Peak # | RetTime [min] | Type | Width [min] | Area [pA*s] | Area %   | Name           |
|--------|---------------|------|-------------|-------------|----------|----------------|
| 1      | 13.454        |      | 0.0000      | 0.00000     | 0.00000  | miristico      |
| 2      | 16.969        | BB   | 0.0473      | 41.36796    | 3.02591  | palmitico      |
| 3      | 17.520        |      | 0.0000      | 0.00000     | 0.00000  | t-palmitoleico |
| 4      | 17.931        |      | 0.0000      | 0.00000     | 0.00000  | palmitoleico   |
| 5      | 19.107        |      | 0.0000      | 0.00000     | 0.00000  | eptadecanoico  |
| 6      | 19.781        |      | 0.0000      | 0.00000     | 0.00000  | eptadecenoico  |
| 7      | 20.881        | MM   | 0.0673      | 1.59962     | 0.11701  | ?              |
| 8      | 21.027        | MM   | 0.0580      | 33.74583    | 2.46838  | stearico       |
| 9      | 21.500        |      | 0.0000      | 0.00000     | 0.00000  | t-oleico       |
| 10     | 21.664        | VV   | 0.0473      | 84.88789    | 6.20924  | oleico         |
| 11     | 21.825        | VB   | 0.0503      | 5.99419     | 0.43845  | ?              |
| 12     | 22.183        |      | 0.0000      | 0.00000     | 0.00000  | t-oleico       |
| 13     | 22.547        | VB   | 0.0578      | 4.09894     | 0.29982  | ?              |
| 14     | 22.813        | BB   | 0.0536      | 88.20469    | 6.45185  | t-linoleico    |
| 15     | 23.059        |      | 0.0000      | 0.00000     | 0.00000  | linoleico      |
| 16     | 24.060        |      | 0.0000      | 0.00000     | 0.00000  | t-linolenico   |
| 17     | 24.443        |      | 0.0000      | 0.00000     | 0.00000  | linolenico     |
| 18     | 25.365        | BV   | 0.0612      | 6.61809     | 0.48409  | arachico       |
| 19     | 26.137        | VP   | 0.0614      | 9.83613     | 0.71948  | eicosenoico    |
| 20     | 31.254        | MF   | 0.1092      | 960.40857   | 70.25037 | punicico       |
| 21     | 31.309        | FM   | 0.0344      | 63.45509    | 4.64151  | behenico       |
| 22     | 32.060        | VB   | 0.1098      | 41.75057    | 3.05390  | ?              |
| 23     | 32.876        | VB   | 0.1063      | 8.04074     | 0.58815  | ?              |
| 24     | 37.846        | VV   | 0.3208      | 17.11417    | 1.25184  | lignocericico  |

**Figure S35.** GC-FID chromatogram of FAMES in PSO-22 sample.



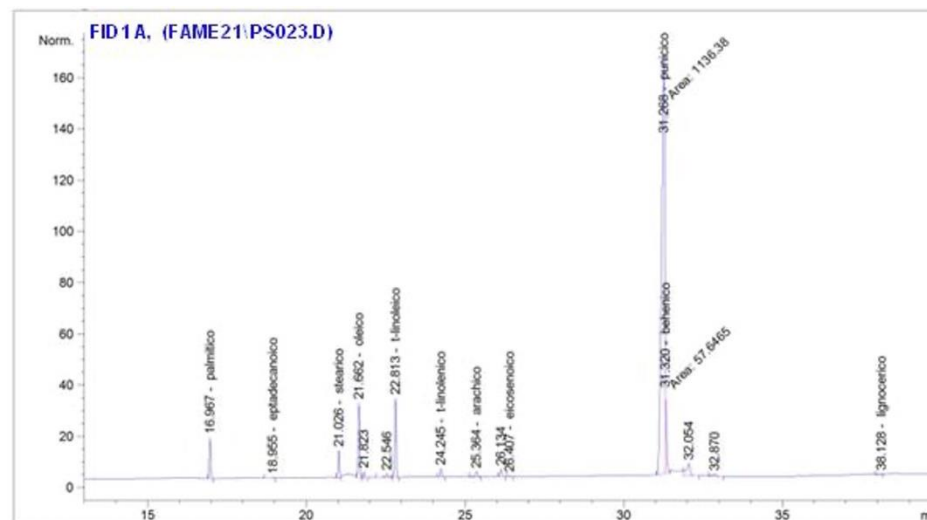

Signal 1: FID1 A,

| Peak # | RetTime [min] | Type | Width [min] | Area [pA*s] | Area %   | Name           |
|--------|---------------|------|-------------|-------------|----------|----------------|
| 1      | 13.454        |      | 0.0000      | 0.00000     | 0.00000  | miristico      |
| 2      | 16.967        | PB   | 0.0442      | 47.03426    | 2.97916  | palmitico      |
| 3      | 17.520        |      | 0.0000      | 0.00000     | 0.00000  | t-palmitoleico |
| 4      | 17.931        |      | 0.0000      | 0.00000     | 0.00000  | palmitoleico   |
| 5      | 18.955        | BP   | 0.0511      | 9.35450e-1  | 0.05925  | eptadecanoico  |
| 6      | 19.781        |      | 0.0000      | 0.00000     | 0.00000  | eptadecenoico  |
| 7      | 21.026        | VV   | 0.0532      | 34.81901    | 2.20544  | stearico       |
| 8      | 21.500        |      | 0.0000      | 0.00000     | 0.00000  | t-oleico       |
| 9      | 21.662        | VV   | 0.0506      | 95.10838    | 6.02418  | oleico         |
| 10     | 21.823        | VB   | 0.0515      | 7.15448     | 0.45317  | ?              |
| 11     | 22.183        |      | 0.0000      | 0.00000     | 0.00000  | t-oleico       |
| 12     | 22.546        | VV   | 0.0725      | 7.12044     | 0.45101  | ?              |
| 13     | 22.813        | VB   | 0.0511      | 101.91060   | 6.45504  | t-linoleico    |
| 14     | 23.059        |      | 0.0000      | 0.00000     | 0.00000  | linoleico      |
| 15     | 24.245        | VB   | 0.0590      | 12.34761    | 0.78210  | t-linolenico   |
| 16     | 24.443        |      | 0.0000      | 0.00000     | 0.00000  | linolenico     |
| 17     | 25.364        | BB   | 0.0699      | 9.25165     | 0.58600  | arachico       |
| 18     | 26.134        | VB   | 0.0641      | 12.18571    | 0.77185  | ?              |
| 19     | 26.407        | BB   | 0.0849      | 1.77102     | 0.11218  | eicosenoico    |
| 20     | 31.268        | MF   | 0.1147      | 1136.37573  | 71.97827 | punicico       |
| 21     | 31.320        | FM   | 0.0300      | 57.64653    | 3.65134  | behenico       |
| 22     | 32.054        | VB   | 0.1280      | 43.02905    | 2.72547  | ?              |
| 23     | 32.870        | VP   | 0.1099      | 6.11007     | 0.38701  | ?              |
| 24     | 38.128        | VV   | 0.1694      | 5.97614     | 0.37853  | lignocericico  |

**Figure S36.** GC-FID chromatogram of FAMES in PSO-23 sample.

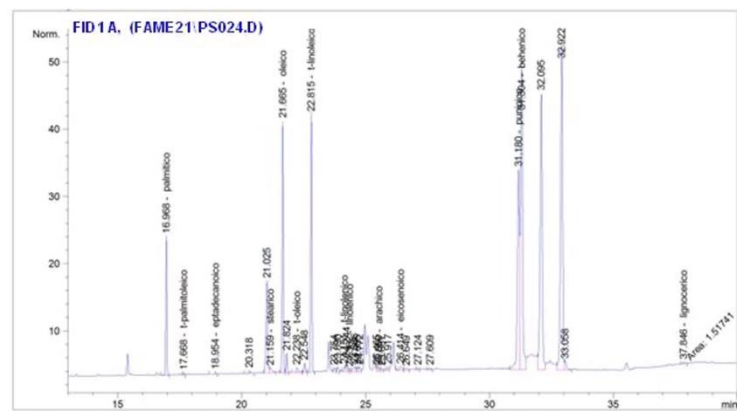

Signal 1: FID1 A,

| Peak # | RetTime [min] | Type | Width [min] | Area [pA*s] | Area %   | Name           |
|--------|---------------|------|-------------|-------------|----------|----------------|
| 1      | 13.454        |      | 0.0000      | 0.00000     | 0.00000  | miristico      |
| 2      | 16.968        | VB   | 0.0467      | 60.52050    | 4.22344  | palmitico      |
| 3      | 17.668        | VV   | 0.0488      | 1.03228     | 0.07204  | t-palmitoleico |
| 4      | 17.931        |      | 0.0000      | 0.00000     | 0.00000  | palmitoleico   |
| 5      | 18.954        | VB   | 0.0559      | 1.41762     | 0.09893  | eptadecanoico  |
| 6      | 19.781        |      | 0.0000      | 0.00000     | 0.00000  | eptadecenoico  |
| 7      | 20.318        | PB   | 0.0641      | 1.78545     | 0.12460  | ?              |
| 8      | 21.025        | VV   | 0.0669      | 64.00162    | 4.46637  | ?              |
| 9      | 21.159        | VV   | 0.0971      | 4.98575     | 0.34793  | stearico       |
| 10     | 21.500        |      | 0.0000      | 0.00000     | 0.00000  | t-oleico       |
| 11     | 21.665        | VV   | 0.0508      | 122.81997   | 8.57102  | oleico         |
| 12     | 21.824        | VV   | 0.0503      | 9.30140     | 0.64910  | ?              |
| 13     | 22.238        | VV   | 0.0795      | 4.14875     | 0.28952  | t-oleico       |
| 14     | 22.548        | VV   | 0.0562      | 4.81941     | 0.33632  | ?              |
| 15     | 22.815        | VB   | 0.0547      | 132.21677   | 9.22677  | t-linoleico    |
| 16     | 23.059        |      | 0.0000      | 0.00000     | 0.00000  | linoleico      |
| 17     | 23.754        | VV   | 0.0722      | 2.71645     | 0.18957  | ?              |
| 18     | 23.890        | VV   | 0.0671      | 3.19621     | 0.22305  | ?              |
| 19     | 24.151        | VV   | 0.0682      | 3.24716     | 0.22660  | t-linolenico   |
| 20     | 24.244        | VV   | 0.0604      | 6.65349     | 0.46431  | ?              |
| 21     | 24.362        | VV   | 0.0681      | 1.36567     | 0.09530  | linolenico     |
| 22     | 24.566        | VV   | 0.0934      | 5.04689     | 0.35220  | ?              |
| 23     | 24.685        | VV   | 0.0663      | 2.45617     | 0.17140  | ?              |
| 24     | 24.772        | VV   | 0.0684      | 2.77493     | 0.19365  | ?              |
| 25     | 25.465        | VV   | 0.0608      | 2.25478     | 0.15735  | ?              |
| 26     | 25.550        | VV   | 0.0634      | 1.84285     | 0.12860  | arachico       |
| 27     | 25.661        | VV   | 0.0784      | 1.93072     | 0.13474  | ?              |
| 28     | 25.917        | VV   | 0.0753      | 2.83927     | 0.19814  | ?              |
| 29     | 26.414        | VV   | 0.1193      | 5.04097     | 0.35179  | eicosenoico    |
| 30     | 26.649        | VV   | 0.1245      | 2.43745     | 0.17010  | ?              |
| 31     | 27.124        | VV   | 0.0839      | 1.74071     | 0.12148  | ?              |
| 32     | 27.609        | VV   | 0.0918      | 1.67455     | 0.11686  | ?              |
| 33     | 31.180        | VV   | 0.0915      | 182.48399   | 12.73468 | punicoico      |
| 34     | 31.304        | VV   | 0.0818      | 252.89340   | 17.64822 | behenico       |
| 35     | 32.095        | VV   | 0.0893      | 244.51610   | 17.06360 | ?              |
| 36     | 32.922        | VV   | 0.0923      | 290.46475   | 20.27014 | ?              |
| 37     | 33.058        | VB   | 0.0786      | 6.82520     | 0.47630  | ?              |
| 38     | 37.846        | MM   | 0.0915      | 1.51741     | 0.10589  | lignocericico  |

Figure S37. GC-FID chromatogram of FAMES in PSO-24 sample.

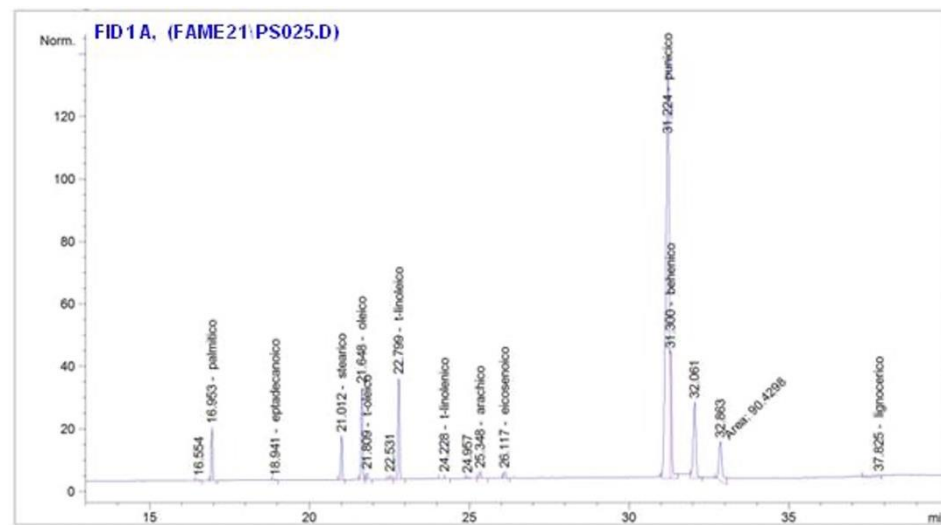

Signal 1: FID1 A,

| Peak # | RetTime [min] | Type | Width [min] | Area [pA*s] | Area %   | Name           |
|--------|---------------|------|-------------|-------------|----------|----------------|
| 1      | 13.454        |      | 0.0000      | 0.00000     | 0.00000  | miristico      |
| 2      | 16.554        | PV   | 0.0512      | 1.12139     | 0.06752  | ?              |
| 3      | 16.953        | PB   | 0.0467      | 50.02279    | 3.01202  | palmitico      |
| 4      | 17.520        |      | 0.0000      | 0.00000     | 0.00000  | t-palmitoleico |
| 5      | 17.931        |      | 0.0000      | 0.00000     | 0.00000  | palmitoleico   |
| 6      | 18.941        | BV   | 0.0501      | 1.06079     | 0.06387  | eptadecanoico  |
| 7      | 19.781        |      | 0.0000      | 0.00000     | 0.00000  | eptadecenoico  |
| 8      | 21.012        | VV   | 0.0494      | 44.54191    | 2.68200  | stearico       |
| 9      | 21.648        | VV   | 0.0528      | 96.19995    | 5.79249  | oleico         |
| 10     | 21.809        | VP   | 0.0504      | 6.89609     | 0.41523  | t-oleico       |
| 11     | 22.183        |      | 0.0000      | 0.00000     | 0.00000  | t-oleico       |
| 12     | 22.531        | VP   | 0.0539      | 3.99358     | 0.24047  | ?              |
| 13     | 22.799        | VB   | 0.0537      | 107.81712   | 6.49199  | t-linoleico    |
| 14     | 23.059        |      | 0.0000      | 0.00000     | 0.00000  | linoleico      |
| 15     | 24.228        | VP   | 0.0592      | 3.85055     | 0.23185  | t-linolenico   |
| 16     | 24.443        |      | 0.0000      | 0.00000     | 0.00000  | linolenico     |
| 17     | 24.957        | VV   | 0.0871      | 3.63110     | 0.21864  | ?              |
| 18     | 25.348        | VB   | 0.0593      | 8.16912     | 0.49189  | arachico       |
| 19     | 26.117        | VV   | 0.0653      | 8.70250     | 0.52400  | eicosenoico    |
| 20     | 31.224        | VV   | 0.1005      | 938.58673   | 56.51514 | punicico       |
| 21     | 31.300        | VV   | 0.0558      | 135.19650   | 8.14059  | behenico       |
| 22     | 32.061        | VB   | 0.0910      | 143.00349   | 8.61067  | ?              |
| 23     | 32.863        | MM   | 0.1207      | 90.42981    | 5.44505  | ?              |
| 24     | 37.825        | VV   | 0.2970      | 17.54705    | 1.05656  | lignocericico  |

Figure S38. GC-FID chromatogram of FAMES in PSO-25 sample.



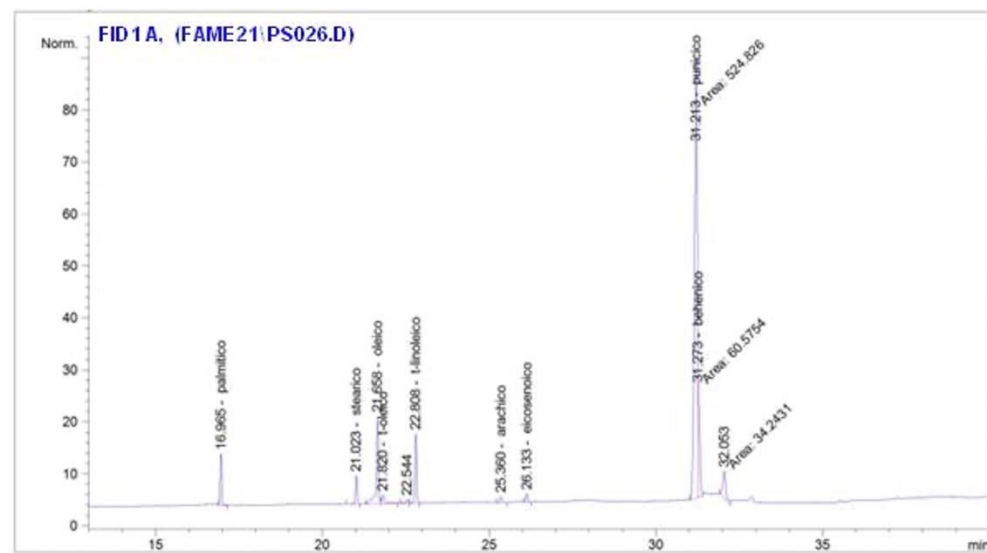

Signal 1: FID1 A,

| Peak # | RetTime [min] | Type | Width [min] | Area [pA*s] | Area %   | Name           |
|--------|---------------|------|-------------|-------------|----------|----------------|
| 1      | 13.454        |      | 0.0000      | 0.00000     | 0.00000  | miristico      |
| 2      | 16.965        | VV   | 0.0490      | 31.46835    | 3.86447  | palmitico      |
| 3      | 17.520        |      | 0.0000      | 0.00000     | 0.00000  | t-palmitoleico |
| 4      | 17.931        |      | 0.0000      | 0.00000     | 0.00000  | palmitoleico   |
| 5      | 19.107        |      | 0.0000      | 0.00000     | 0.00000  | eptadecanoico  |
| 6      | 19.781        |      | 0.0000      | 0.00000     | 0.00000  | eptadecenoico  |
| 7      | 21.023        | PV   | 0.0520      | 18.57936    | 2.28164  | stearico       |
| 8      | 21.658        | VV   | 0.0646      | 71.69086    | 8.80400  | oleico         |
| 9      | 21.820        | VV   | 0.0850      | 10.54302    | 1.29474  | t-oleico       |
| 10     | 22.183        |      | 0.0000      | 0.00000     | 0.00000  | t-oleico       |
| 11     | 22.544        | VV   | 0.0658      | 3.53716     | 0.43438  | ?              |
| 12     | 22.808        | VV   | 0.0559      | 46.99254    | 5.77092  | t-linoleico    |
| 13     | 23.059        |      | 0.0000      | 0.00000     | 0.00000  | linoleico      |
| 14     | 24.060        |      | 0.0000      | 0.00000     | 0.00000  | t-linolenico   |
| 15     | 24.443        |      | 0.0000      | 0.00000     | 0.00000  | linolenico     |
| 16     | 25.360        | VB   | 0.0664      | 5.19890     | 0.63845  | arachico       |
| 17     | 26.133        | VB   | 0.0621      | 6.64393     | 0.81591  | eicosenoico    |
| 18     | 31.213        | MF   | 0.1031      | 524.82635   | 64.45131 | punico         |
| 19     | 31.273        | FM   | 0.0471      | 60.57536    | 7.43896  | behenico       |
| 20     | 32.053        | MM   | 0.1093      | 34.24314    | 4.20523  | ?              |
| 21     | 38.096        |      | 0.0000      | 0.00000     | 0.00000  | lignocericico  |

**Figure S39.** GC-FID chromatogram of FAMES in PSO-26 sample.

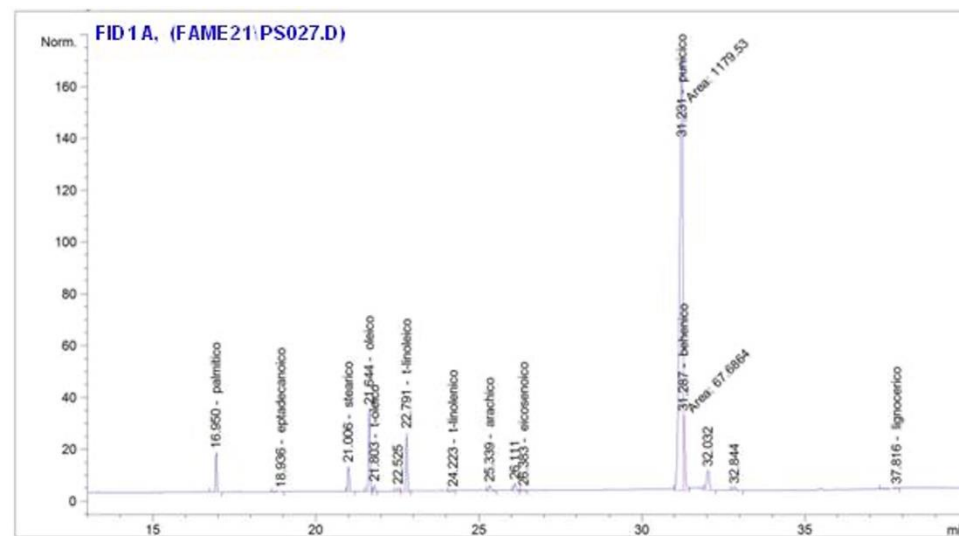

Signal 1: FID1 A,

| Peak # | RetTime [min] | Type | Width [min] | Area [pA*s] | Area %   | Name           |
|--------|---------------|------|-------------|-------------|----------|----------------|
| 1      | 13.454        |      | 0.0000      | 0.00000     | 0.00000  | miristico      |
| 2      | 16.950        | BB   | 0.0471      | 45.97673    | 2.87116  | palmitico      |
| 3      | 17.520        |      | 0.0000      | 0.00000     | 0.00000  | t-palmitoleico |
| 4      | 17.931        |      | 0.0000      | 0.00000     | 0.00000  | palmitoleico   |
| 5      | 18.936        | VB   | 0.0512      | 9.17360e-1  | 0.05729  | eptadecanoico  |
| 6      | 19.781        |      | 0.0000      | 0.00000     | 0.00000  | eptadecenoico  |
| 7      | 21.006        | BP   | 0.0498      | 31.47252    | 1.96540  | stearico       |
| 8      | 21.644        | VV   | 0.0499      | 102.51798   | 6.40206  | oleico         |
| 9      | 21.803        | VV   | 0.0506      | 7.67787     | 0.47947  | t-oleico       |
| 10     | 22.183        |      | 0.0000      | 0.00000     | 0.00000  | t-oleico       |
| 11     | 22.525        | VV   | 0.0531      | 4.06711     | 0.25398  | ?              |
| 12     | 22.791        | VV   | 0.0535      | 75.52543    | 4.71643  | t-linoleico    |
| 13     | 23.059        |      | 0.0000      | 0.00000     | 0.00000  | linoleico      |
| 14     | 24.223        | BV   | 0.1378      | 2.65164     | 0.16559  | t-linolenico   |
| 15     | 24.443        |      | 0.0000      | 0.00000     | 0.00000  | linolenico     |
| 16     | 25.339        | VB   | 0.0754      | 10.61598    | 0.66295  | arachico       |
| 17     | 26.111        | VB   | 0.0685      | 13.56508    | 0.84711  | ?              |
| 18     | 26.383        | BV   | 0.1130      | 3.33466     | 0.20824  | eicosenoico    |
| 19     | 31.231        | MF   | 0.1170      | 1179.53467  | 73.65981 | punico         |
| 20     | 31.287        | FM   | 0.0388      | 67.68643    | 4.22690  | behenico       |
| 21     | 32.032        | VV   | 0.0908      | 45.69516    | 2.85358  | ?              |
| 22     | 32.844        | BP   | 0.0893      | 6.71837     | 0.41955  | ?              |
| 23     | 37.816        | VV   | 0.1708      | 3.37042     | 0.21048  | lignocericico  |

**Figure S40.** GC-FID chromatogram of FAMES in PSO-27 sample.

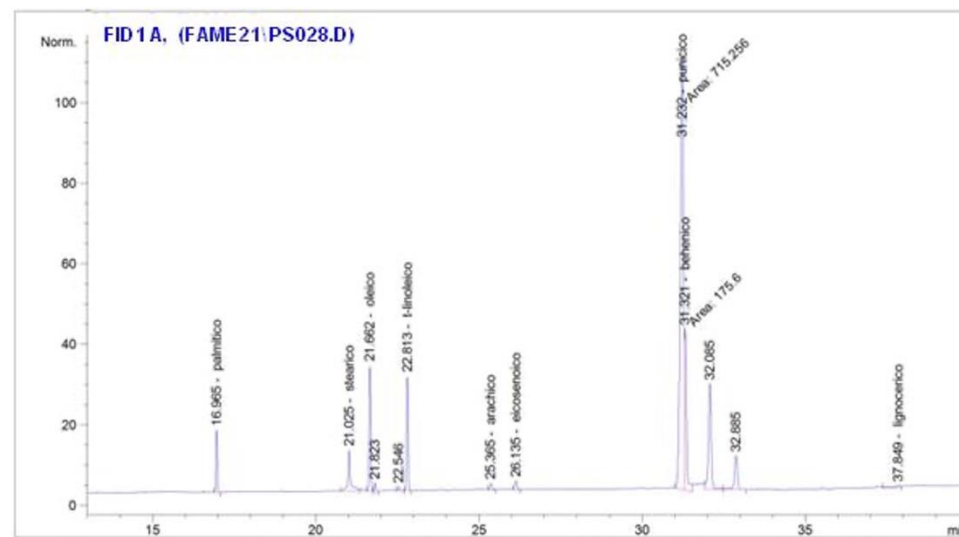

Signal 1: FID1 A,

| Peak # | RetTime [min] | Type | Width [min] | Area [pA*s] | Area %   | Name           |
|--------|---------------|------|-------------|-------------|----------|----------------|
| 1      | 13.454        |      | 0.0000      | 0.00000     | 0.00000  | miristico      |
| 2      | 16.965        | VB   | 0.0465      | 45.23878    | 3.14103  | palmitico      |
| 3      | 17.520        |      | 0.0000      | 0.00000     | 0.00000  | t-palmitoleico |
| 4      | 17.931        |      | 0.0000      | 0.00000     | 0.00000  | palmitoleico   |
| 5      | 19.107        |      | 0.0000      | 0.00000     | 0.00000  | eptadecanoico  |
| 6      | 19.781        |      | 0.0000      | 0.00000     | 0.00000  | eptadecenoico  |
| 7      | 21.025        | VV   | 0.0772      | 56.69807    | 3.93667  | stearico       |
| 8      | 21.500        |      | 0.0000      | 0.00000     | 0.00000  | t-oleico       |
| 9      | 21.662        | VV   | 0.0507      | 102.40443   | 7.11016  | oleico         |
| 10     | 21.823        | VB   | 0.0504      | 6.32662     | 0.43927  | ?              |
| 11     | 22.183        |      | 0.0000      | 0.00000     | 0.00000  | t-oleico       |
| 12     | 22.546        | VB   | 0.0579      | 3.76109     | 0.26114  | ?              |
| 13     | 22.813        | BB   | 0.0507      | 93.17314    | 6.46921  | t-linoleico    |
| 14     | 23.059        |      | 0.0000      | 0.00000     | 0.00000  | linoleico      |
| 15     | 24.060        |      | 0.0000      | 0.00000     | 0.00000  | t-linolenico   |
| 16     | 24.443        |      | 0.0000      | 0.00000     | 0.00000  | linolenico     |
| 17     | 25.365        | VV   | 0.0655      | 7.22461     | 0.50162  | arachico       |
| 18     | 26.135        | VB   | 0.0643      | 9.67528     | 0.67178  | eicosenoico    |
| 19     | 31.232        | MF   | 0.1105      | 715.25647   | 49.66179 | punicico       |
| 20     | 31.321        | FM   | 0.0730      | 175.60004   | 12.19229 | behenico       |
| 21     | 32.085        | VV   | 0.0900      | 157.89554   | 10.96302 | ?              |
| 22     | 32.885        | VB   | 0.0987      | 55.17049    | 3.83061  | ?              |
| 23     | 37.849        | VV   | 0.2720      | 11.83065    | 0.82143  | lignocericico  |

**Figure S41.** GC-FID chromatogram of FAMES in PSO-28 sample.

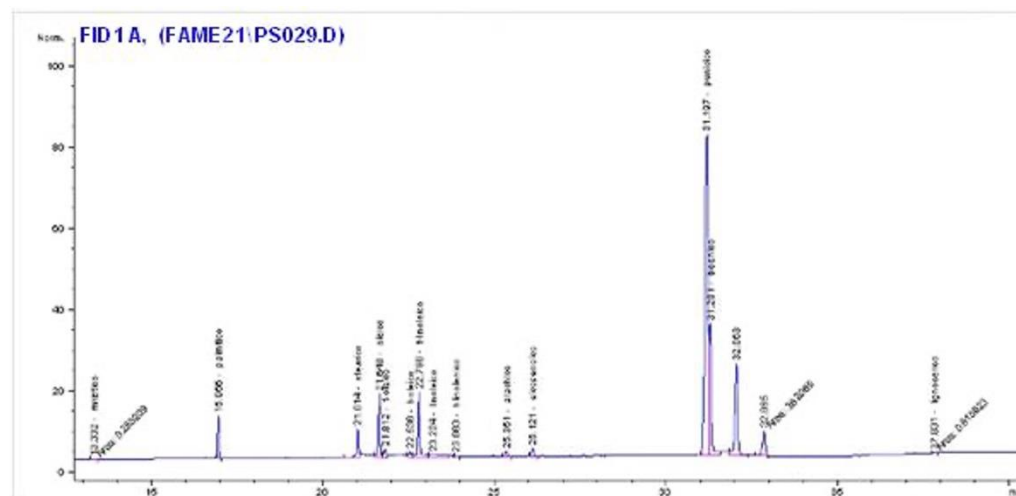

| Peak # | RetTime [min] | Type | Width [min] | Area [pA*s] | Area %   | Name           |
|--------|---------------|------|-------------|-------------|----------|----------------|
| 1      | 13.332        | MM   | 0.0640      | 2.85209e-1  | 0.02702  | miristico      |
| 2      | 16.956        | VV   | 0.0470      | 31.39370    | 2.97465  | palmitico      |
| 3      | 17.656        |      | 0.0000      | 0.00000     | 0.00000  | t-palmitoleico |
| 4      | 17.931        |      | 0.0000      | 0.00000     | 0.00000  | palmitoleico   |
| 5      | 19.107        |      | 0.0000      | 0.00000     | 0.00000  | eptadecanoico  |
| 6      | 19.781        |      | 0.0000      | 0.00000     | 0.00000  | eptadecenoico  |
| 7      | 21.014        | VV   | 0.0638      | 31.39359    | 2.97464  | stearico       |
| 8      | 21.648        | VV   | 0.0541      | 56.01372    | 5.30747  | oleico         |
| 9      | 21.812        | VV   | 0.0681      | 8.91848     | 0.84505  | t-oleico       |
| 10     | 22.536        | VV   | 0.0774      | 7.16220     | 0.67864  | t-oleico       |
| 11     | 22.798        | VV   | 0.0616      | 67.49591    | 6.39544  | t-linoleico    |
| 12     | 23.224        | VV   | 0.3340      | 16.89696    | 1.60104  | linoleico      |
| 13     | 23.863        | VV   | 0.1002      | 2.47198     | 0.23423  | t-linolenico   |
| 14     | 24.443        |      | 0.0000      | 0.00000     | 0.00000  | linolenico     |
| 15     | 25.351        | VV   | 0.0709      | 5.73683     | 0.54358  | arachico       |
| 16     | 26.121        | VV   | 0.0638      | 7.89040     | 0.74764  | eicosenoico    |
| 17     | 31.197        | VV   | 0.0997      | 505.64423   | 47.91131 | punicoico      |
| 18     | 31.291        | VV   | 0.0644      | 143.92046   | 13.63689 | beenico        |
| 19     | 32.063        | VB   | 0.0916      | 133.32950   | 12.63337 | ?              |
| 20     | 32.865        | MF   | 0.0995      | 36.20649    | 3.43067  | ?              |
| 21     | 37.831        | MM   | 0.1012      | 6.15923e-1  | 0.05836  | lignocericico  |

**Figure S42.** GC-FID chromatogram of FAMES in PSO-29 sample.

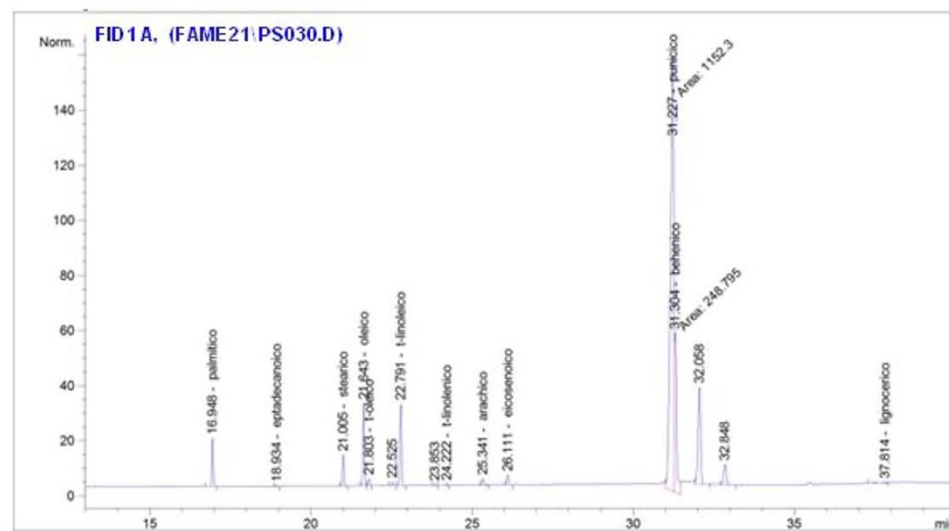

Signal 1: FID1 A,

| Peak # | RetTime [min] | Type | Width [min] | Area [pA*s] | Area %   | Name           |
|--------|---------------|------|-------------|-------------|----------|----------------|
| 1      | 13.454        |      | 0.0000      | 0.00000     | 0.00000  | miristico      |
| 2      | 16.948        | VB   | 0.0471      | 52.56183    | 2.66154  | palmitico      |
| 3      | 17.520        |      | 0.0000      | 0.00000     | 0.00000  | t-palmitoleico |
| 4      | 17.931        |      | 0.0000      | 0.00000     | 0.00000  | palmitoleico   |
| 5      | 18.934        | PB   | 0.0452      | 9.68505e-1  | 0.04904  | eptadecanoico  |
| 6      | 19.781        |      | 0.0000      | 0.00000     | 0.00000  | eptadecenoico  |
| 7      | 21.005        | VB   | 0.0498      | 36.11513    | 1.82874  | stearico       |
| 8      | 21.643        | VV   | 0.0536      | 99.10519    | 5.01833  | oleico         |
| 9      | 21.803        | VV   | 0.0505      | 8.59099     | 0.43502  | t-oleico       |
| 10     | 22.183        |      | 0.0000      | 0.00000     | 0.00000  | t-oleico       |
| 11     | 22.525        | VV   | 0.0545      | 4.59867     | 0.23286  | ?              |
| 12     | 22.791        | VB   | 0.0543      | 100.18019   | 5.07277  | t-linoleico    |
| 13     | 23.059        |      | 0.0000      | 0.00000     | 0.00000  | linoleico      |
| 14     | 23.853        | VV   | 0.0693      | 1.27988     | 0.06481  | ?              |
| 15     | 24.222        | VV   | 0.0781      | 2.86439     | 0.14504  | t-linolenico   |
| 16     | 24.443        |      | 0.0000      | 0.00000     | 0.00000  | linolenico     |
| 17     | 25.341        | VV   | 0.0642      | 9.84403     | 0.49847  | arachico       |
| 18     | 26.111        | VB   | 0.0626      | 14.77086    | 0.74794  | eicosenoico    |
| 19     | 31.227        | MF   | 0.1211      | 1152.30090  | 58.34839 | punico         |
| 20     | 31.304        | FM   | 0.0716      | 248.79466   | 12.59807 | behenico       |
| 21     | 32.058        | VB   | 0.0853      | 197.55849   | 10.00365 | ?              |
| 22     | 32.848        | BP   | 0.0879      | 41.27054    | 2.08979  | ?              |
| 23     | 37.814        | VV   | 0.1692      | 4.05913     | 0.20554  | lignocericico  |

**Figure S43.** GC-FID chromatogram of FAMES in PSO-30 sample.



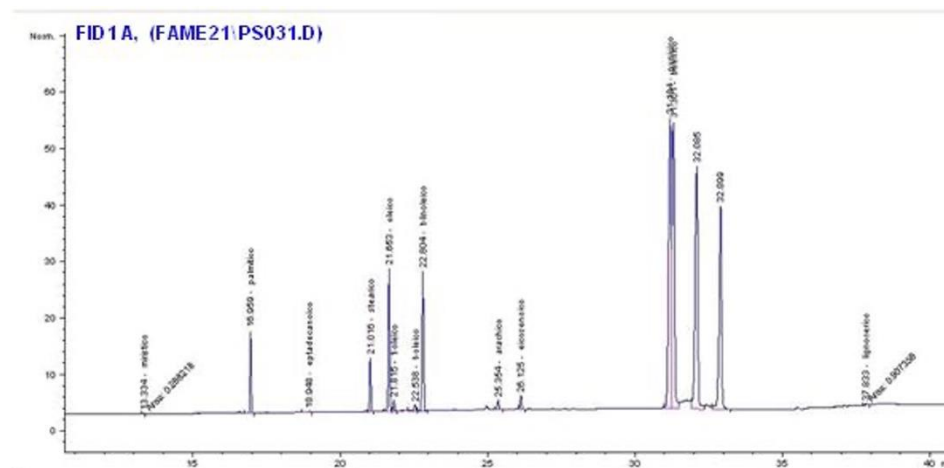

Signal 1: FID1 A,

| Peak # | RetTime [min] | Type | Width [min] | Area [pA*s] | Area %   | Name           |
|--------|---------------|------|-------------|-------------|----------|----------------|
| 1      | 13.334        | MM   | 0.0484      | 2.68218e-1  | 0.02014  | miristico      |
| 2      | 16.959        | VB   | 0.0441      | 42.71738    | 3.20825  | palmitico      |
| 3      | 17.656        |      | 0.0000      | 0.00000     | 0.00000  | t-palmitoleico |
| 4      | 17.931        |      | 0.0000      | 0.00000     | 0.00000  | palmitoleico   |
| 5      | 18.948        | BP   | 0.0507      | 8.41245e-1  | 0.06318  | eptadecanoico  |
| 6      | 19.781        |      | 0.0000      | 0.00000     | 0.00000  | eptadecenoico  |
| 7      | 21.016        | VV   | 0.0524      | 30.91331    | 2.32172  | stearico       |
| 8      | 21.653        | VV   | 0.0509      | 83.81708    | 6.29501  | oleico         |
| 9      | 21.815        | VB   | 0.0529      | 6.89921     | 0.51816  | t-oleico       |
| 10     | 22.538        | VV   | 0.0607      | 4.72357     | 0.35476  | t-oleico       |
| 11     | 22.804        | VB   | 0.0517      | 83.13610    | 6.24387  | t-linoleico    |
| 12     | 23.059        |      | 0.0000      | 0.00000     | 0.00000  | linoleico      |
| 13     | 24.060        |      | 0.0000      | 0.00000     | 0.00000  | t-linolenico   |
| 14     | 24.443        |      | 0.0000      | 0.00000     | 0.00000  | linolenico     |
| 15     | 25.354        | VV   | 0.0635      | 6.71012     | 0.50396  | arachico       |
| 16     | 26.125        | VP   | 0.0620      | 9.86635     | 0.74100  | eicosenoico    |
| 17     | 31.184        | VV   | 0.0979      | 322.10785   | 24.19164 | punicico       |
| 18     | 31.301        | VV   | 0.0776      | 262.61166   | 19.72322 | beenico        |
| 19     | 32.085        | VV   | 0.0901      | 259.24307   | 19.47023 | ?              |
| 20     | 32.899        | VP   | 0.0928      | 216.72188   | 16.27671 | ?              |
| 21     | 37.833        | MM   | 0.0907      | 9.07356e-1  | 0.06815  | lignocericico  |

**Figure S44.** GC-FID chromatogram of FAMES in PSO-31 sample.

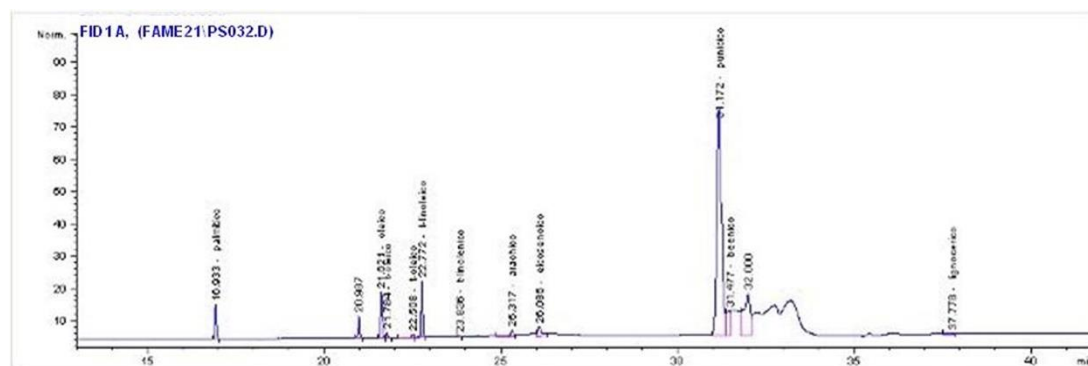

Signal 1: FID1 A,

| Peak # | RetTime [min] | Type | Width [min] | Area [pA*s] | Area %   | Name           |
|--------|---------------|------|-------------|-------------|----------|----------------|
| 1      | 13.454        |      | 0.0000      | 0.00000     | 0.00000  | miristico      |
| 2      | 16.933        | VB   | 0.0468      | 30.65531    | 2.86548  | palmitico      |
| 3      | 17.656        |      | 0.0000      | 0.00000     | 0.00000  | t-palmitoleico |
| 4      | 17.931        |      | 0.0000      | 0.00000     | 0.00000  | palmitoleico   |
| 5      | 19.107        |      | 0.0000      | 0.00000     | 0.00000  | eptadecanoico  |
| 6      | 19.781        |      | 0.0000      | 0.00000     | 0.00000  | eptadecenoico  |
| 7      | 20.987        | VB   | 0.0495      | 21.58584    | 2.01772  | ?              |
| 8      | 21.318        |      | 0.0000      | 0.00000     | 0.00000  | stearico       |
| 9      | 21.621        | VV   | 0.0503      | 46.41059    | 4.33820  | oleico         |
| 10     | 21.784        | VP   | 0.0533      | 5.32578     | 0.49782  | t-oleico       |
| 11     | 22.508        | VV   | 0.0513      | 3.17204     | 0.29650  | t-oleico       |
| 12     | 22.772        | VV   | 0.0517      | 58.36521    | 5.45565  | t-linoleico    |
| 13     | 23.059        |      | 0.0000      | 0.00000     | 0.00000  | linoleico      |
| 14     | 23.836        | VV   | 0.0883      | 1.81766     | 0.16990  | t-linolenico   |
| 15     | 24.443        |      | 0.0000      | 0.00000     | 0.00000  | linolenico     |
| 16     | 25.317        | VV   | 0.1071      | 14.12401    | 1.32023  | arachico       |
| 17     | 26.086        | VV   | 0.1082      | 24.07653    | 2.25054  | eicosenoico    |
| 18     | 31.172        | VV   | 0.1290      | 625.03131   | 58.42434 | punicico       |
| 19     | 31.477        | VV   | 0.1076      | 65.40681    | 6.11385  | beenico        |
| 20     | 32.000        | VV   | 0.1692      | 169.12489   | 15.80883 | ?              |
| 21     | 37.778        | VV   | 0.1909      | 4.71717     | 0.44093  | lignocericico  |

**Figure S45.** GC-FID chromatogram of FAMES in PSO-32 sample.
